# Supplementary material
Source: PubMed Central journal article supplement (PMC3078287)
Supplement: hhe0067-0183-s01.pdf [file hhe0067-0183-s01.pdf]

Supplementary Table 1. Power of MDR to detect any correct model loci in the presence of locus heterogeneity with 250 cases and controls

| Proportion of data |    | 0.9 |    |     |    |     |    |    |    |    |     |
|--------------------|----|-----|----|-----|----|-----|----|----|----|----|-----|
| Model              | 1  | 2   | 3  | 4   | 5  | 8   | 9  | 10 | 11 | 12 |     |
| 0.1                | 1  | NA  | 24 | 98  | 98 | 100 | 32 | 35 | 66 | 95 | 100 |
|                    | 2  | 26  | NA | 98  | 93 | 98  | 45 | 31 | 67 | 98 | 99  |
|                    | 3  | 21  | 21 | NA  | 96 | 99  | 40 | 36 | 64 | 98 | 97  |
|                    | 4  | 18  | 24 | 98  | NA | 100 | 31 | 35 | 60 | 95 | 98  |
|                    | 5  | 22  | 20 | 99  | 94 | NA  | 34 | 38 | 69 | 94 | 99  |
|                    | 8  | 33  | 33 | 100 | 96 | 99  | NA | 36 | 66 | 94 | 96  |
|                    | 9  | 33  | 30 | 98  | 96 | 99  | 50 | NA | 79 | 93 | 99  |
|                    | 10 | 56  | 46 | 99  | 94 | 98  | 51 | 47 | NA | 93 | 96  |
|                    | 11 | 65  | 58 | 99  | 96 | 96  | 64 | 61 | 76 | NA | 98  |
|                    | 12 | 32  | 41 | 98  | 96 | 98  | 37 | 51 | 66 | 97 | NA  |

| Proportion of data |    | 0.75 |    |     |    |     |    |    |    |    |    |
|--------------------|----|------|----|-----|----|-----|----|----|----|----|----|
| Model              | 1  | 2    | 3  | 4   | 5  | 8   | 9  | 10 | 11 | 12 |    |
| 0.25               | 1  | NA   | 16 | 96  | 70 | 98  | 28 | 33 | 54 | 79 | 91 |
|                    | 2  | 20   | NA | 98  | 84 | 96  | 31 | 31 | 57 | 84 | 92 |
|                    | 3  | 19   | 23 | NA  | 80 | 99  | 32 | 27 | 57 | 91 | 89 |
|                    | 4  | 22   | 27 | 98  | NA | 100 | 36 | 43 | 59 | 83 | 92 |
|                    | 5  | 28   | 18 | 100 | 82 | NA  | 36 | 47 | 59 | 81 | 94 |
|                    | 8  | 26   | 27 | 96  | 89 | 98  | NA | 36 | 69 | 83 | 94 |
|                    | 9  | 32   | 33 | 99  | 79 | 100 | 45 | NA | 58 | 79 | 93 |
|                    | 10 | 52   | 49 | 95  | 88 | 97  | 48 | 42 | NA | 85 | 94 |
|                    | 11 | 65   | 48 | 97  | 76 | 100 | 52 | 55 | 52 | NA | 92 |
|                    | 12 | 38   | 37 | 98  | 83 | 100 | 49 | 45 | 45 | 77 | NA |

| Proportion of data |    | 0.5 |    |    |    |    |    |    |    |    |    |
|--------------------|----|-----|----|----|----|----|----|----|----|----|----|
| Model              | 1  | 2   | 3  | 4  | 5  | 8  | 9  | 10 | 11 | 12 |    |
| 0.5                | 1  | NA  |    |    |    |    |    |    |    |    |    |
|                    | 2  | 16  | NA |    |    |    |    |    |    |    |    |
|                    | 3  | 73  | 67 | NA |    |    |    |    |    |    |    |
|                    | 4  | 47  | 48 | 70 | NA |    |    |    |    |    |    |
|                    | 5  | 59  | 69 | 78 | 73 | NA |    |    |    |    |    |
|                    | 8  | 31  | 23 | 74 | 52 | 80 | NA |    |    |    |    |
|                    | 9  | 29  | 36 | 69 | 50 | 79 | 45 | NA |    |    |    |
|                    | 10 | 45  | 44 | 87 | 56 | 73 | 53 | 56 | NA |    |    |
|                    | 11 | 60  | 52 | 80 | 70 | 78 | 55 | 53 | 53 | NA |    |
|                    | 12 | 74  | 65 | 84 | 70 | 79 | 63 | 72 | 54 | 68 | NA |

Supplementary Table 2. Power of MDR to detect either correct model in the presence of locus heterogeneity with 250 cases and controls

| Proportion of data |           | <b>0.9</b> |    |    |    |     |    |    |    |    |    |
|--------------------|-----------|------------|----|----|----|-----|----|----|----|----|----|
|                    | Model     | 1          | 2  | 3  | 4  | 5   | 8  | 9  | 10 | 11 | 12 |
| <b>0.1</b>         | <b>1</b>  | NA         | 1  | 97 | 98 | 100 | 1  | 6  | 59 | 92 | 98 |
|                    | <b>2</b>  | 1          | NA | 98 | 88 | 98  | 6  | 3  | 59 | 97 | 98 |
|                    | <b>3</b>  | 1          | 0  | NA | 95 | 99  | 5  | 8  | 56 | 95 | 96 |
|                    | <b>4</b>  | 1          | 1  | 98 | NA | 100 | 4  | 3  | 53 | 93 | 98 |
|                    | <b>5</b>  | 0          | 2  | 98 | 94 | NA  | 6  | 8  | 61 | 92 | 99 |
|                    | <b>8</b>  | 3          | 3  | 99 | 94 | 99  | NA | 4  | 48 | 94 | 95 |
|                    | <b>9</b>  | 3          | 2  | 98 | 94 | 99  | 5  | NA | 55 | 92 | 98 |
|                    | <b>10</b> | 2          | 7  | 99 | 92 | 98  | 7  | 7  | NA | 92 | 96 |
|                    | <b>11</b> | 4          | 3  | 99 | 95 | 96  | 3  | 4  | 49 | NA | 98 |
|                    | <b>12</b> | 3          | 3  | 98 | 93 | 97  | 7  | 18 | 55 | 96 | NA |

| Proportion of data |           | <b>0.75</b> |    |    |    |     |    |    |    |    |    |
|--------------------|-----------|-------------|----|----|----|-----|----|----|----|----|----|
|                    | Model     | 1           | 2  | 3  | 4  | 5   | 8  | 9  | 10 | 11 | 12 |
| <b>0.25</b>        | <b>1</b>  | NA          | 1  | 96 | 68 | 97  | 1  | 5  | 37 | 75 | 87 |
|                    | <b>2</b>  | 0           | NA | 98 | 74 | 95  | 3  | 6  | 36 | 78 | 88 |
|                    | <b>3</b>  | 2           | 5  | NA | 76 | 97  | 12 | 8  | 41 | 86 | 86 |
|                    | <b>4</b>  | 1           | 2  | 98 | NA | 100 | 3  | 2  | 42 | 79 | 86 |
|                    | <b>5</b>  | 3           | 4  | 99 | 79 | NA  | 7  | 14 | 45 | 77 | 92 |
|                    | <b>8</b>  | 2           | 2  | 96 | 86 | 98  | NA | 1  | 46 | 78 | 92 |
|                    | <b>9</b>  | 1           | 3  | 99 | 72 | 98  | 3  | NA | 33 | 71 | 92 |
|                    | <b>10</b> | 4           | 4  | 94 | 79 | 97  | 2  | 7  | NA | 75 | 90 |
|                    | <b>11</b> | 9           | 5  | 95 | 66 | 98  | 8  | 13 | 23 | NA | 90 |
|                    | <b>12</b> | 11          | 8  | 98 | 75 | 100 | 11 | 13 | 36 | 71 | NA |

| Proportion of data |           | <b>0.5</b> |    |    |    |    |    |    |    |    |    |
|--------------------|-----------|------------|----|----|----|----|----|----|----|----|----|
|                    | Model     | 1          | 2  | 3  | 4  | 5  | 8  | 9  | 10 | 11 | 12 |
| <b>0.5</b>         | <b>1</b>  | NA         |    |    |    |    |    |    |    |    |    |
|                    | <b>2</b>  | 1          | NA |    |    |    |    |    |    |    |    |
|                    | <b>3</b>  | 60         | 59 | NA |    |    |    |    |    |    |    |
|                    | <b>4</b>  | 33         | 25 | 64 | NA |    |    |    |    |    |    |
|                    | <b>5</b>  | 48         | 58 | 73 | 68 | NA |    |    |    |    |    |
|                    | <b>8</b>  | 4          | 2  | 69 | 24 | 70 | NA |    |    |    |    |
|                    | <b>9</b>  | 1          | 4  | 56 | 29 | 64 | 11 | NA |    |    |    |
|                    | <b>10</b> | 12         | 14 | 68 | 32 | 62 | 16 | 15 | NA |    |    |
|                    | <b>11</b> | 38         | 31 | 67 | 57 | 70 | 27 | 29 | 29 | NA |    |
|                    | <b>12</b> | 60         | 49 | 80 | 59 | 71 | 47 | 49 | 39 | 52 | NA |

Supplementary Table 3. Power of MDR to detect both models in the presence of locus heterogeneity with 250 cases and controls.

| Proportion of data |    | 0.9 |    |    |    |    |    |    |    |    |    |
|--------------------|----|-----|----|----|----|----|----|----|----|----|----|
| Model              | 1  | 2   | 3  | 4  | 5  | 8  | 9  | 10 | 11 | 12 |    |
| 0.1                | 1  | NA  | 0  | 0  | 0  | 0  | 0  | 0  | 0  | 0  | 0  |
|                    | 2  | 0   | NA | 0  | 0  | 0  | 0  | 0  | 0  | 0  | 0  |
|                    | 3  | 0   | 0  | NA | 0  | 0  | 0  | 0  | 0  | 0  | 0  |
|                    | 4  | 0   | 0  | 0  | NA | 0  | 0  | 0  | 0  | 0  | 0  |
|                    | 5  | 0   | 0  | 0  | 0  | NA | 0  | 0  | 0  | 0  | 0  |
|                    | 8  | 0   | 0  | 0  | 0  | 0  | NA | 0  | 0  | 0  | 0  |
|                    | 9  | 0   | 0  | 0  | 0  | 0  | 0  | NA | 1  | 1  | 0  |
|                    | 10 | 0   | 0  | 0  | 0  | 0  | 0  | 0  | NA | 0  | 0  |
|                    | 11 | 0   | 0  | 0  | 0  | 0  | 0  | 0  | 0  | NA | 0  |
|                    | 12 | 0   | 0  | 0  | 0  | 0  | 0  | 0  | 0  | 0  | NA |

| Proportion of data |    | 0.75 |    |    |    |    |    |    |    |    |    |
|--------------------|----|------|----|----|----|----|----|----|----|----|----|
| Model              | 1  | 2    | 3  | 4  | 5  | 8  | 9  | 10 | 11 | 12 |    |
| 0.25               | 1  | NA   | 0  | 0  | 0  | 0  | 0  | 0  | 0  | 0  | 0  |
|                    | 2  | 0    | NA | 0  | 0  | 0  | 0  | 0  | 0  | 0  | 0  |
|                    | 3  | 0    | 0  | NA | 0  | 1  | 1  | 0  | 0  | 0  | 0  |
|                    | 4  | 0    | 0  | 0  | NA | 0  | 0  | 0  | 0  | 0  | 0  |
|                    | 5  | 0    | 0  | 0  | 0  | NA | 0  | 0  | 0  | 0  | 0  |
|                    | 8  | 0    | 0  | 0  | 0  | 0  | NA | 0  | 0  | 0  | 0  |
|                    | 9  | 0    | 0  | 0  | 0  | 0  | 0  | NA | 0  | 0  | 0  |
|                    | 10 | 0    | 0  | 0  | 0  | 0  | 0  | 0  | NA | 0  | 0  |
|                    | 11 | 0    | 0  | 0  | 0  | 0  | 0  | 0  | 0  | NA | 0  |
|                    | 12 | 0    | 0  | 0  | 0  | 0  | 0  | 0  | 0  | 0  | NA |

| Proportion of data |    | 0.5 |    |    |    |    |    |    |    |    |    |
|--------------------|----|-----|----|----|----|----|----|----|----|----|----|
| Model              | 1  | 2   | 3  | 4  | 5  | 8  | 9  | 10 | 11 | 12 |    |
| 0.5                | 1  | NA  |    |    |    |    |    |    |    |    |    |
|                    | 2  | 0   | NA |    |    |    |    |    |    |    |    |
|                    | 3  | 0   | 0  | NA |    |    |    |    |    |    |    |
|                    | 4  | 0   | 0  | 0  | NA |    |    |    |    |    |    |
|                    | 5  | 0   | 0  | 0  | 0  | NA |    |    |    |    |    |
|                    | 8  | 0   | 0  | 0  | 0  | 0  | NA |    |    |    |    |
|                    | 9  | 0   | 0  | 0  | 0  | 0  | 0  | NA |    |    |    |
|                    | 10 | 0   | 0  | 1  | 0  | 0  | 1  | 0  | NA |    |    |
|                    | 11 | 0   | 0  | 0  | 0  | 1  | 0  | 0  | 0  | NA |    |
|                    | 12 | 0   | 0  | 1  | 0  | 0  | 0  | 0  | 1  | 0  | NA |

Supplementary Table 4. Power of MDR to detect any correct model locus in the presence of locus heterogeneity with 250 cases and 500 controls.

| Proportion of data |       | <b>0.9</b> |    |    |     |     |    |    |    |     |    |
|--------------------|-------|------------|----|----|-----|-----|----|----|----|-----|----|
|                    | Model | 1          | 2  | 3  | 4   | 5   | 8  | 9  | 10 | 11  | 12 |
| <b>0.1</b>         | 1     | NA         | 17 | 99 | 99  | 98  | 24 | 36 | 73 | 98  | 98 |
|                    | 2     | 11         | NA | 99 | 100 | 100 | 34 | 35 | 74 | 99  | 98 |
|                    | 3     | 15         | 13 | NA | 100 | 100 | 39 | 27 | 78 | 100 | 99 |
|                    | 4     | 14         | 27 | 99 | NA  | 100 | 42 | 35 | 76 | 98  | 99 |
|                    | 5     | 20         | 25 | 99 | 98  | NA  | 34 | 37 | 75 | 97  | 97 |
|                    | 8     | 27         | 31 | 97 | 99  | 100 | NA | 30 | 71 | 98  | 98 |
|                    | 9     | 23         | 17 | 99 | 98  | 100 | 43 | NA | 75 | 97  | 99 |
|                    | 10    | 45         | 55 | 98 | 100 | 100 | 58 | 53 | NA | 97  | 97 |
|                    | 11    | 77         | 81 | 99 | 96  | 99  | 80 | 78 | 78 | NA  | 99 |
|                    | 12    | 39         | 37 | 98 | 96  | 99  | 48 | 31 | 75 | 97  | NA |

| Proportion of data |       | <b>0.75</b> |    |     |    |     |    |    |    |    |    |
|--------------------|-------|-------------|----|-----|----|-----|----|----|----|----|----|
|                    | Model | 1           | 2  | 3   | 4  | 5   | 8  | 9  | 10 | 11 | 12 |
| <b>0.25</b>        | 1     | NA          | 19 | 100 | 92 | 98  | 36 | 31 | 70 | 97 | 99 |
|                    | 2     | 13          | NA | 99  | 92 | 100 | 38 | 35 | 63 | 95 | 96 |
|                    | 3     | 22          | 17 | NA  | 94 | 100 | 34 | 39 | 67 | 94 | 99 |
|                    | 4     | 31          | 18 | 100 | NA | 100 | 40 | 34 | 73 | 96 | 96 |
|                    | 5     | 27          | 27 | 100 | 94 | NA  | 39 | 44 | 60 | 92 | 97 |
|                    | 8     | 26          | 22 | 99  | 97 | 98  | NA | 41 | 72 | 94 | 98 |
|                    | 9     | 25          | 22 | 99  | 96 | 98  | 39 | NA | 74 | 96 | 99 |
|                    | 10    | 53          | 46 | 98  | 91 | 100 | 57 | 47 | NA | 96 | 98 |
|                    | 11    | 65          | 70 | 99  | 88 | 100 | 65 | 60 | 76 | NA | 99 |
|                    | 12    | 39          | 38 | 99  | 93 | 98  | 53 | 51 | 69 | 92 | NA |

| Proportion of data |       | <b>0.5</b> |    |    |    |    |    |    |    |    |    |
|--------------------|-------|------------|----|----|----|----|----|----|----|----|----|
|                    | Model | 1          | 2  | 3  | 4  | 5  | 8  | 9  | 10 | 11 | 12 |
| <b>0.5</b>         | 1     | NA         |    |    |    |    |    |    |    |    |    |
|                    | 2     | 18         | NA |    |    |    |    |    |    |    |    |
|                    | 3     | 77         | 87 | NA |    |    |    |    |    |    |    |
|                    | 4     | 61         | 46 | 83 | NA |    |    |    |    |    |    |
|                    | 5     | 87         | 69 | 84 | 77 | NA |    |    |    |    |    |
|                    | 8     | 29         | 31 | 83 | 61 | 89 | NA |    |    |    |    |
|                    | 9     | 23         | 29 | 86 | 71 | 84 | 34 | NA |    |    |    |
|                    | 10    | 49         | 42 | 93 | 65 | 88 | 49 | 58 | NA |    |    |
|                    | 11    | 75         | 66 | 92 | 81 | 84 | 67 | 65 | 69 | NA |    |
|                    | 12    | 79         | 79 | 87 | 76 | 88 | 82 | 82 | 78 | 75 | NA |

Supplementary Table 5. Power of MDR to detect either correct model in the presence of locus heterogeneity with 250 cases and 500 controls

| Proportion of data |       | <b>0.9</b> |    |    |     |     |    |    |    |    |    |
|--------------------|-------|------------|----|----|-----|-----|----|----|----|----|----|
|                    | Model | 1          | 2  | 3  | 4   | 5   | 8  | 9  | 10 | 11 | 12 |
| <b>0.1</b>         | 1     | NA         | 0  | 99 | 98  | 98  | 3  | 4  | 66 | 97 | 98 |
|                    | 2     | 0          | NA | 99 | 100 | 100 | 1  | 9  | 68 | 99 | 97 |
|                    | 3     | 0          | 2  | NA | 99  | 100 | 6  | 6  | 73 | 98 | 97 |
|                    | 4     | 0          | 3  | 99 | NA  | 100 | 4  | 13 | 72 | 97 | 99 |
|                    | 5     | 0          | 1  | 99 | 98  | NA  | 2  | 12 | 73 | 97 | 97 |
|                    | 8     | 1          | 3  | 96 | 99  | 100 | NA | 5  | 68 | 98 | 98 |
|                    | 9     | 4          | 1  | 99 | 97  | 100 | 1  | NA | 67 | 97 | 98 |
|                    | 10    | 3          | 7  | 98 | 100 | 100 | 6  | 10 | NA | 97 | 96 |
|                    | 11    | 4          | 5  | 99 | 95  | 99  | 5  | 5  | 56 | NA | 99 |
|                    | 12    | 8          | 5  | 97 | 96  | 99  | 5  | 9  | 64 | 97 | NA |

| Proportion of data |       | <b>0.75</b> |    |     |    |     |    |    |    |    |    |
|--------------------|-------|-------------|----|-----|----|-----|----|----|----|----|----|
|                    | Model | 1           | 2  | 3   | 4  | 5   | 8  | 9  | 10 | 11 | 12 |
| <b>0.25</b>        | 1     | NA          | 1  | 100 | 89 | 98  | 1  | 7  | 57 | 96 | 98 |
|                    | 2     | 0           | NA | 99  | 89 | 100 | 5  | 6  | 50 | 93 | 95 |
|                    | 3     | 6           | 6  | NA  | 90 | 100 | 8  | 19 | 51 | 92 | 99 |
|                    | 4     | 8           | 4  | 100 | NA | 100 | 7  | 8  | 61 | 94 | 95 |
|                    | 5     | 5           | 5  | 100 | 92 | NA  | 14 | 14 | 49 | 92 | 96 |
|                    | 8     | 2           | 1  | 97  | 92 | 98  | NA | 6  | 50 | 94 | 97 |
|                    | 9     | 3           | 3  | 99  | 94 | 97  | 7  | NA | 55 | 92 | 99 |
|                    | 10    | 6           | 6  | 97  | 88 | 100 | 8  | 7  | NA | 90 | 97 |
|                    | 11    | 9           | 11 | 99  | 84 | 99  | 15 | 10 | 51 | NA | 99 |
|                    | 12    | 7           | 14 | 99  | 91 | 97  | 12 | 14 | 56 | 87 | NA |

| Proportion of data |       | <b>0.5</b> |    |    |    |    |    |    |    |    |    |
|--------------------|-------|------------|----|----|----|----|----|----|----|----|----|
|                    | Model | 1          | 2  | 3  | 4  | 5  | 8  | 9  | 10 | 11 | 12 |
| <b>0.5</b>         | 1     | NA         |    |    |    |    |    |    |    |    |    |
|                    | 2     | 0          | NA |    |    |    |    |    |    |    |    |
|                    | 3     | 72         | 85 | NA |    |    |    |    |    |    |    |
|                    | 4     | 45         | 34 | 81 | NA |    |    |    |    |    |    |
|                    | 5     | 79         | 60 | 81 | 76 | NA |    |    |    |    |    |
|                    | 8     | 1          | 2  | 80 | 41 | 77 | NA |    |    |    |    |
|                    | 9     | 3          | 2  | 76 | 46 | 77 | 3  | NA |    |    |    |
|                    | 10    | 15         | 19 | 87 | 49 | 82 | 14 | 16 | NA |    |    |
|                    | 11    | 54         | 46 | 88 | 69 | 80 | 50 | 50 | 48 | NA |    |
|                    | 12    | 67         | 70 | 84 | 67 | 87 | 71 | 69 | 71 | 68 | NA |

Supplementary Table 6. Power of MDR to detect both models in the presence of locus heterogeneity with 250 cases and 500 controls.

| Proportion of data |    | 0.9 |    |    |    |    |    |    |    |    |    |
|--------------------|----|-----|----|----|----|----|----|----|----|----|----|
| Model              | 1  | 2   | 3  | 4  | 5  | 8  | 9  | 10 | 11 | 12 |    |
| 0.1                | 1  | NA  | 0  | 0  | 0  | 0  | 0  | 0  | 0  | 0  | 0  |
|                    | 2  | 0   | NA | 0  | 0  | 0  | 0  | 0  | 0  | 0  | 0  |
|                    | 3  | 0   | 0  | NA | 0  | 0  | 0  | 0  | 0  | 0  | 0  |
|                    | 4  | 0   | 0  | 0  | NA | 0  | 0  | 0  | 0  | 0  | 0  |
|                    | 5  | 0   | 0  | 0  | 0  | NA | 0  | 0  | 0  | 0  | 0  |
|                    | 8  | 0   | 0  | 0  | 0  | 0  | NA | 0  | 0  | 0  | 0  |
|                    | 9  | 0   | 0  | 0  | 0  | 2  | 0  | NA | 0  | 0  | 0  |
|                    | 10 | 0   | 0  | 0  | 0  | 0  | 0  | 0  | NA | 0  | 0  |
|                    | 11 | 0   | 0  | 0  | 0  | 0  | 0  | 0  | 0  | NA | 0  |
|                    | 12 | 0   | 0  | 0  | 0  | 0  | 0  | 0  | 0  | 0  | NA |

| Proportion of data |    | 0.75 |    |    |    |    |    |    |    |    |    |
|--------------------|----|------|----|----|----|----|----|----|----|----|----|
| Model              | 1  | 2    | 3  | 4  | 5  | 8  | 9  | 10 | 11 | 12 |    |
| 0.25               | 1  | NA   | 0  | 0  | 0  | 0  | 0  | 0  | 0  | 0  | 0  |
|                    | 2  | 0    | NA | 0  | 0  | 0  | 0  | 0  | 0  | 0  | 0  |
|                    | 3  | 0    | 0  | NA | 0  | 0  | 0  | 0  | 0  | 0  | 0  |
|                    | 4  | 0    | 0  | 1  | NA | 0  | 0  | 0  | 0  | 0  | 0  |
|                    | 5  | 0    | 0  | 0  | 0  | NA | 1  | 0  | 0  | 0  | 0  |
|                    | 8  | 0    | 0  | 0  | 0  | 0  | NA | 0  | 0  | 0  | 0  |
|                    | 9  | 0    | 0  | 0  | 0  | 0  | 0  | NA | 0  | 0  | 0  |
|                    | 10 | 0    | 0  | 0  | 0  | 0  | 0  | 0  | NA | 0  | 0  |
|                    | 11 | 0    | 0  | 0  | 0  | 0  | 0  | 0  | 1  | NA | 0  |
|                    | 12 | 0    | 0  | 1  | 0  | 0  | 0  | 0  | 1  | 0  | NA |

| Proportion of data |    | 0.5 |    |    |    |    |    |    |    |    |    |
|--------------------|----|-----|----|----|----|----|----|----|----|----|----|
| Model              | 1  | 2   | 3  | 4  | 5  | 8  | 9  | 10 | 11 | 12 |    |
| 0.5                | 1  | NA  |    |    |    |    |    |    |    |    |    |
|                    | 2  | 0   | NA |    |    |    |    |    |    |    |    |
|                    | 3  | 0   | 0  | NA |    |    |    |    |    |    |    |
|                    | 4  | 0   | 0  | 0  | NA |    |    |    |    |    |    |
|                    | 5  | 0   | 0  | 1  | 1  | NA |    |    |    |    |    |
|                    | 8  | 0   | 0  | 0  | 0  | 0  | NA |    |    |    |    |
|                    | 9  | 0   | 0  | 0  | 0  | 0  | 1  | NA |    |    |    |
|                    | 10 | 0   | 0  | 0  | 1  | 0  | 0  | 0  | NA |    |    |
|                    | 11 | 0   | 0  | 0  | 0  | 1  | 0  | 0  | 0  | NA |    |
|                    | 12 | 0   | 0  | 1  | 0  | 1  | 0  | 1  | 0  | 0  | NA |

Supplementary Table 7. Power of MDR to detect any correct model locus in the presence of locus heterogeneity with 250 cases and 1000 controls

| Proportion of data |       | <b>0.9</b> |    |     |     |     |    |    |    |     |     |
|--------------------|-------|------------|----|-----|-----|-----|----|----|----|-----|-----|
|                    | Model | 1          | 2  | 3   | 4   | 5   | 8  | 9  | 10 | 11  | 12  |
| <b>0.1</b>         | 1     | NA         | 18 | 100 | 99  | 98  | 22 | 29 | 80 | 99  | 99  |
|                    | 2     | 12         | NA | 99  | 99  | 100 | 30 | 28 | 87 | 99  | 99  |
|                    | 3     | 17         | 10 | NA  | 98  | 100 | 27 | 22 | 79 | 98  | 99  |
|                    | 4     | 21         | 9  | 100 | NA  | 100 | 27 | 29 | 82 | 97  | 97  |
|                    | 5     | 12         | 25 | 98  | 100 | NA  | 32 | 30 | 81 | 98  | 100 |
|                    | 8     | 22         | 23 | 99  | 99  | 100 | NA | 39 | 81 | 100 | 98  |
|                    | 9     | 31         | 27 | 100 | 98  | 99  | 38 | NA | 88 | 95  | 97  |
|                    | 10    | 66         | 58 | 100 | 99  | 100 | 65 | 64 | NA | 97  | 98  |
|                    | 11    | 79         | 75 | 97  | 98  | 100 | 77 | 70 | 82 | NA  | 100 |
|                    | 12    | 28         | 36 | 99  | 100 | 99  | 48 | 44 | 86 | 99  | NA  |

| Proportion of data |       | <b>0.75</b> |    |     |     |     |    |    |    |    |     |
|--------------------|-------|-------------|----|-----|-----|-----|----|----|----|----|-----|
|                    | Model | 1           | 2  | 3   | 4   | 5   | 8  | 9  | 10 | 11 | 12  |
| <b>0.25</b>        | 1     | NA          | 12 | 100 | 94  | 100 | 25 | 24 | 71 | 95 | 100 |
|                    | 2     | 11          | NA | 98  | 98  | 97  | 33 | 27 | 70 | 97 | 98  |
|                    | 3     | 20          | 20 | NA  | 95  | 99  | 42 | 23 | 64 | 95 | 99  |
|                    | 4     | 30          | 23 | 99  | NA  | 99  | 29 | 37 | 67 | 95 | 98  |
|                    | 5     | 22          | 22 | 99  | 97  | NA  | 38 | 42 | 74 | 96 | 99  |
|                    | 8     | 24          | 21 | 99  | 97  | 99  | NA | 20 | 75 | 98 | 97  |
|                    | 9     | 27          | 19 | 99  | 98  | 98  | 39 | NA | 76 | 98 | 100 |
|                    | 10    | 64          | 59 | 98  | 100 | 99  | 48 | 53 | NA | 96 | 100 |
|                    | 11    | 65          | 58 | 100 | 96  | 99  | 57 | 74 | 82 | NA | 98  |
|                    | 12    | 45          | 38 | 100 | 98  | 100 | 44 | 46 | 76 | 95 | NA  |

| Proportion of data |       | <b>0.5</b> |    |    |    |    |    |    |    |    |    |
|--------------------|-------|------------|----|----|----|----|----|----|----|----|----|
|                    | Model | 1          | 2  | 3  | 4  | 5  | 8  | 9  | 10 | 11 | 12 |
| <b>0.5</b>         | 1     | NA         |    |    |    |    |    |    |    |    |    |
|                    | 2     | 14         | NA |    |    |    |    |    |    |    |    |
|                    | 3     | 80         | 84 | NA |    |    |    |    |    |    |    |
|                    | 4     | 63         | 59 | 90 | NA |    |    |    |    |    |    |
|                    | 5     | 88         | 89 | 93 | 91 | NA |    |    |    |    |    |
|                    | 8     | 21         | 19 | 80 | 69 | 94 | NA |    |    |    |    |
|                    | 9     | 26         | 29 | 86 | 75 | 89 | 29 | NA |    |    |    |
|                    | 10    | 45         | 47 | 94 | 71 | 89 | 51 | 56 | NA |    |    |
|                    | 11    | 83         | 73 | 94 | 82 | 95 | 76 | 73 | 75 | NA |    |
|                    | 12    | 80         | 83 | 93 | 84 | 92 | 85 | 91 | 87 | 85 | NA |

Supplementary Table 8. Power of MDR to detect either correct model in the presence of locus heterogeneity with 250 cases and 1000 controls

| Proportion of data |           | <b>0.9</b> |    |     |     |     |    |    |    |     |    |
|--------------------|-----------|------------|----|-----|-----|-----|----|----|----|-----|----|
|                    | Model     | 1          | 2  | 3   | 4   | 5   | 8  | 9  | 10 | 11  | 12 |
| <b>0.1</b>         | <b>1</b>  | NA         | 1  | 99  | 99  | 98  | 2  | 6  | 79 | 99  | 99 |
|                    | <b>2</b>  | 0          | NA | 99  | 99  | 100 | 5  | 5  | 84 | 99  | 97 |
|                    | <b>3</b>  | 0          | 1  | NA  | 97  | 99  | 2  | 10 | 74 | 98  | 99 |
|                    | <b>4</b>  | 1          | 2  | 99  | NA  | 100 | 1  | 9  | 79 | 96  | 97 |
|                    | <b>5</b>  | 0          | 1  | 98  | 100 | NA  | 5  | 9  | 79 | 98  | 99 |
|                    | <b>8</b>  | 0          | 0  | 99  | 98  | 100 | NA | 4  | 79 | 100 | 98 |
|                    | <b>9</b>  | 4          | 0  | 99  | 97  | 99  | 5  | NA | 77 | 95  | 96 |
|                    | <b>10</b> | 4          | 7  | 100 | 97  | 100 | 11 | 11 | NA | 97  | 97 |
|                    | <b>11</b> | 3          | 2  | 96  | 97  | 100 | 3  | 4  | 69 | NA  | 99 |
|                    | <b>12</b> | 5          | 3  | 99  | 100 | 99  | 9  | 10 | 81 | 98  | NA |

| Proportion of data |           | <b>0.75</b> |    |     |    |     |    |    |    |    |     |
|--------------------|-----------|-------------|----|-----|----|-----|----|----|----|----|-----|
|                    | Model     | 1           | 2  | 3   | 4  | 5   | 8  | 9  | 10 | 11 | 12  |
| <b>0.25</b>        | <b>1</b>  | NA          | 0  | 100 | 91 | 100 | 3  | 4  | 60 | 95 | 100 |
|                    | <b>2</b>  | 0           | NA | 98  | 97 | 96  | 1  | 5  | 60 | 95 | 96  |
|                    | <b>3</b>  | 6           | 7  | NA  | 94 | 99  | 14 | 7  | 55 | 95 | 99  |
|                    | <b>4</b>  | 9           | 1  | 99  | NA | 99  | 4  | 7  | 60 | 93 | 98  |
|                    | <b>5</b>  | 5           | 11 | 99  | 95 | NA  | 13 | 18 | 64 | 91 | 99  |
|                    | <b>8</b>  | 1           | 0  | 99  | 96 | 99  | NA | 3  | 61 | 96 | 97  |
|                    | <b>9</b>  | 1           | 0  | 99  | 97 | 98  | 3  | NA | 58 | 98 | 100 |
|                    | <b>10</b> | 8           | 7  | 98  | 99 | 99  | 7  | 14 | NA | 95 | 100 |
|                    | <b>11</b> | 9           | 11 | 100 | 93 | 98  | 11 | 8  | 57 | NA | 98  |
|                    | <b>12</b> | 17          | 13 | 100 | 95 | 100 | 13 | 15 | 70 | 92 | NA  |

| Proportion of data |           | <b>0.5</b> |    |    |    |    |    |    |    |    |    |
|--------------------|-----------|------------|----|----|----|----|----|----|----|----|----|
|                    | Model     | 1          | 2  | 3  | 4  | 5  | 8  | 9  | 10 | 11 | 12 |
| <b>0.5</b>         | <b>1</b>  | NA         |    |    |    |    |    |    |    |    |    |
|                    | <b>2</b>  | 0          | NA |    |    |    |    |    |    |    |    |
|                    | <b>3</b>  | 79         | 83 | NA |    |    |    |    |    |    |    |
|                    | <b>4</b>  | 54         | 54 | 87 | NA |    |    |    |    |    |    |
|                    | <b>5</b>  | 85         | 83 | 91 | 87 | NA |    |    |    |    |    |
|                    | <b>8</b>  | 1          | 0  | 75 | 53 | 92 | NA |    |    |    |    |
|                    | <b>9</b>  | 1          | 2  | 82 | 60 | 82 | 1  | NA |    |    |    |
|                    | <b>10</b> | 20         | 25 | 93 | 59 | 86 | 21 | 23 | NA |    |    |
|                    | <b>11</b> | 66         | 58 | 91 | 73 | 88 | 62 | 58 | 60 | NA |    |
|                    | <b>12</b> | 76         | 80 | 91 | 81 | 88 | 78 | 82 | 80 | 79 | NA |



Supplementary Table 9. Power of MDR to detect both models in the presence of locus heterogeneity with 250 cases and 1000 controls.

| Proportion of data |    | 0.9 |    |    |    |    |    |    |    |    |    |
|--------------------|----|-----|----|----|----|----|----|----|----|----|----|
| Model              | 1  | 2   | 3  | 4  | 5  | 8  | 9  | 10 | 11 | 12 |    |
| 0.1                | 1  | NA  | 0  | 0  | 0  | 0  | 0  | 0  | 0  | 0  | 0  |
|                    | 2  | 0   | NA | 0  | 0  | 0  | 0  | 0  | 0  | 0  | 0  |
|                    | 3  | 0   | 0  | NA | 0  | 0  | 0  | 0  | 0  | 0  | 0  |
|                    | 4  | 0   | 0  | 0  | NA | 0  | 0  | 0  | 0  | 0  | 0  |
|                    | 5  | 0   | 0  | 0  | 0  | NA | 0  | 0  | 0  | 0  | 0  |
|                    | 8  | 0   | 0  | 0  | 0  | 0  | NA | 0  | 0  | 0  | 0  |
|                    | 9  | 0   | 0  | 0  | 0  | 0  | 0  | NA | 0  | 0  | 0  |
|                    | 10 | 0   | 0  | 0  | 0  | 0  | 0  | 0  | NA | 0  | 0  |
|                    | 11 | 0   | 0  | 0  | 0  | 0  | 0  | 0  | 0  | NA | 0  |
|                    | 12 | 0   | 0  | 0  | 0  | 0  | 0  | 0  | 0  | 0  | NA |

| Proportion of data |    | 0.75 |    |    |    |    |    |    |    |    |    |
|--------------------|----|------|----|----|----|----|----|----|----|----|----|
| Model              | 1  | 2    | 3  | 4  | 5  | 8  | 9  | 10 | 11 | 12 |    |
| 0.25               | 1  | NA   | 0  | 0  | 0  | 0  | 0  | 0  | 0  | 0  | 0  |
|                    | 2  | 0    | NA | 0  | 0  | 0  | 0  | 0  | 0  | 0  | 0  |
|                    | 3  | 0    | 0  | NA | 0  | 0  | 0  | 0  | 0  | 1  | 1  |
|                    | 4  | 0    | 0  | 0  | NA | 1  | 0  | 0  | 0  | 0  | 0  |
|                    | 5  | 0    | 0  | 0  | 0  | NA | 0  | 0  | 0  | 0  | 0  |
|                    | 8  | 0    | 0  | 0  | 0  | 0  | NA | 0  | 0  | 0  | 0  |
|                    | 9  | 0    | 0  | 0  | 0  | 0  | 0  | NA | 0  | 0  | 0  |
|                    | 10 | 0    | 0  | 0  | 0  | 0  | 0  | 0  | NA | 0  | 1  |
|                    | 11 | 0    | 0  | 0  | 0  | 0  | 0  | 0  | 0  | NA | 0  |
|                    | 12 | 0    | 0  | 0  | 0  | 0  | 0  | 2  | 0  | 0  | NA |

| Proportion of data |    | 0.5 |    |    |    |    |    |    |    |    |    |
|--------------------|----|-----|----|----|----|----|----|----|----|----|----|
| Model              | 1  | 2   | 3  | 4  | 5  | 8  | 9  | 10 | 11 | 12 |    |
| 0.5                | 1  | NA  |    |    |    |    |    |    |    |    |    |
|                    | 2  | 0   | NA |    |    |    |    |    |    |    |    |
|                    | 3  | 0   | 0  | NA |    |    |    |    |    |    |    |
|                    | 4  | 0   | 0  | 1  | NA |    |    |    |    |    |    |
|                    | 5  | 0   | 0  | 5  | 2  | NA |    |    |    |    |    |
|                    | 8  | 0   | 0  | 0  | 0  | 0  | NA |    |    |    |    |
|                    | 9  | 0   | 0  | 0  | 0  | 0  | 0  | NA |    |    |    |
|                    | 10 | 0   | 0  | 1  | 0  | 0  | 0  | 0  | NA |    |    |
|                    | 11 | 0   | 0  | 1  | 1  | 0  | 0  | 0  | 1  | NA |    |
|                    | 12 | 0   | 0  | 4  | 0  | 1  | 0  | 0  | 1  | 2  | NA |

Supplementary Table 10. Power of MDR to detect any correct model loci in the presence of locus heterogeneity with 500 cases and controls

| Proportion of data |           | <b>0.9</b> |    |     |     |     |    |    |    |     |     |
|--------------------|-----------|------------|----|-----|-----|-----|----|----|----|-----|-----|
|                    | Model     | 1          | 2  | 3   | 4   | 5   | 8  | 9  | 10 | 11  | 12  |
| <b>0.1</b>         | <b>1</b>  | NA         | 13 | 97  | 99  | 100 | 30 | 19 | 89 | 99  | 99  |
|                    | <b>2</b>  | 13         | NA | 99  | 100 | 100 | 24 | 21 | 90 | 98  | 98  |
|                    | <b>3</b>  | 8          | 15 | NA  | 100 | 100 | 24 | 29 | 84 | 97  | 98  |
|                    | <b>4</b>  | 18         | 13 | 100 | NA  | 100 | 33 | 34 | 86 | 99  | 100 |
|                    | <b>5</b>  | 14         | 12 | 97  | 98  | NA  | 31 | 27 | 95 | 98  | 98  |
|                    | <b>8</b>  | 18         | 24 | 99  | 100 | 98  | NA | 18 | 85 | 97  | 98  |
|                    | <b>9</b>  | 20         | 29 | 99  | 100 | 100 | 36 | NA | 92 | 100 | 98  |
|                    | <b>10</b> | 70         | 65 | 100 | 98  | 100 | 71 | 73 | NA | 100 | 100 |
|                    | <b>11</b> | 92         | 89 | 97  | 100 | 99  | 88 | 88 | 89 | NA  | 97  |
|                    | <b>12</b> | 33         | 28 | 99  | 99  | 99  | 46 | 50 | 92 | 100 | NA  |

| Proportion of data |           | <b>0.75</b> |    |     |     |     |    |    |    |     |     |
|--------------------|-----------|-------------|----|-----|-----|-----|----|----|----|-----|-----|
|                    | Model     | 1           | 2  | 3   | 4   | 5   | 8  | 9  | 10 | 11  | 12  |
| <b>0.25</b>        | <b>1</b>  | NA          | 12 | 100 | 100 | 99  | 20 | 30 | 79 | 97  | 100 |
|                    | <b>2</b>  | 8           | NA | 98  | 98  | 97  | 14 | 18 | 79 | 99  | 99  |
|                    | <b>3</b>  | 19          | 18 | NA  | 99  | 100 | 30 | 23 | 74 | 98  | 99  |
|                    | <b>4</b>  | 31          | 20 | 98  | NA  | 95  | 32 | 25 | 82 | 99  | 98  |
|                    | <b>5</b>  | 35          | 24 | 99  | 100 | NA  | 38 | 42 | 76 | 98  | 99  |
|                    | <b>8</b>  | 20          | 27 | 99  | 99  | 100 | NA | 23 | 82 | 93  | 100 |
|                    | <b>9</b>  | 22          | 22 | 99  | 98  | 100 | 33 | NA | 88 | 97  | 99  |
|                    | <b>10</b> | 66          | 60 | 99  | 99  | 99  | 44 | 62 | NA | 98  | 97  |
|                    | <b>11</b> | 79          | 79 | 100 | 100 | 100 | 79 | 82 | 88 | NA  | 98  |
|                    | <b>12</b> | 53          | 47 | 98  | 97  | 100 | 43 | 43 | 84 | 100 | NA  |

| Proportion of data |           | <b>0.5</b> |    |    |    |    |    |    |    |    |    |
|--------------------|-----------|------------|----|----|----|----|----|----|----|----|----|
|                    | Model     | 1          | 2  | 3  | 4  | 5  | 8  | 9  | 10 | 11 | 12 |
| <b>0.5</b>         | <b>1</b>  | NA         |    |    |    |    |    |    |    |    |    |
|                    | <b>2</b>  | 16         | NA |    |    |    |    |    |    |    |    |
|                    | <b>3</b>  | 83         | 90 | NA |    |    |    |    |    |    |    |
|                    | <b>4</b>  | 68         | 73 | 96 | NA |    |    |    |    |    |    |
|                    | <b>5</b>  | 89         | 97 | 94 | 96 | NA |    |    |    |    |    |
|                    | <b>8</b>  | 23         | 20 | 93 | 68 | 90 | NA |    |    |    |    |
|                    | <b>9</b>  | 20         | 19 | 91 | 77 | 93 | 29 | NA |    |    |    |
|                    | <b>10</b> | 57         | 62 | 95 | 87 | 92 | 61 | 59 | NA |    |    |
|                    | <b>11</b> | 78         | 78 | 97 | 87 | 95 | 77 | 77 | 77 | NA |    |
|                    | <b>12</b> | 95         | 93 | 92 | 92 | 91 | 92 | 93 | 90 | 93 | NA |

Supplementary Table 11. Power of MDR to detect either model in the presence of locus heterogeneity with 500 cases and controls

| Proportion of data |       | <b>0.9</b> |    |     |     |     |    |    |    |     |     |
|--------------------|-------|------------|----|-----|-----|-----|----|----|----|-----|-----|
|                    | Model | 1          | 2  | 3   | 4   | 5   | 8  | 9  | 10 | 11  | 12  |
| <b>0.1</b>         | 1     | NA         | 0  | 95  | 99  | 99  | 3  | 6  | 87 | 99  | 99  |
|                    | 2     | 0          | NA | 97  | 100 | 100 | 0  | 3  | 87 | 97  | 98  |
|                    | 3     | 0          | 1  | NA  | 100 | 100 | 1  | 8  | 80 | 97  | 98  |
|                    | 4     | 1          | 1  | 100 | NA  | 100 | 6  | 14 | 85 | 97  | 100 |
|                    | 5     | 1          | 3  | 97  | 98  | NA  | 4  | 8  | 93 | 98  | 96  |
|                    | 8     | 2          | 3  | 99  | 100 | 98  | NA | 3  | 85 | 96  | 98  |
|                    | 9     | 2          | 0  | 99  | 99  | 99  | 3  | NA | 89 | 100 | 98  |
|                    | 10    | 2          | 3  | 100 | 98  | 100 | 5  | 11 | NA | 99  | 100 |
|                    | 11    | 6          | 2  | 96  | 100 | 99  | 4  | 5  | 70 | NA  | 97  |
|                    | 12    | 5          | 4  | 98  | 99  | 98  | 6  | 18 | 89 | 100 | NA  |

| Proportion of data |       | <b>0.75</b> |    |     |     |     |    |    |    |    |     |
|--------------------|-------|-------------|----|-----|-----|-----|----|----|----|----|-----|
|                    | Model | 1           | 2  | 3   | 4   | 5   | 8  | 9  | 10 | 11 | 12  |
| <b>0.25</b>        | 1     | NA          | 0  | 99  | 100 | 99  | 1  | 7  | 78 | 96 | 100 |
|                    | 2     | 0           | NA | 97  | 96  | 97  | 0  | 1  | 76 | 99 | 99  |
|                    | 3     | 8           | 6  | NA  | 99  | 100 | 9  | 14 | 70 | 96 | 98  |
|                    | 4     | 7           | 7  | 98  | NA  | 94  | 7  | 8  | 79 | 99 | 97  |
|                    | 5     | 14          | 12 | 99  | 100 | NA  | 19 | 17 | 69 | 98 | 99  |
|                    | 8     | 1           | 1  | 99  | 99  | 99  | NA | 4  | 72 | 93 | 99  |
|                    | 9     | 3           | 1  | 98  | 97  | 100 | 0  | NA | 69 | 96 | 99  |
|                    | 10    | 11          | 7  | 99  | 99  | 99  | 5  | 10 | NA | 94 | 96  |
|                    | 11    | 12          | 12 | 100 | 100 | 99  | 13 | 15 | 64 | NA | 98  |
|                    | 12    | 26          | 22 | 98  | 97  | 100 | 18 | 18 | 78 | 99 | NA  |

| Proportion of data |       | <b>0.5</b> |    |    |    |    |    |    |    |    |    |
|--------------------|-------|------------|----|----|----|----|----|----|----|----|----|
|                    | Model | 1          | 2  | 3  | 4  | 5  | 8  | 9  | 10 | 11 | 12 |
| <b>0.5</b>         | 1     | NA         |    |    |    |    |    |    |    |    |    |
|                    | 2     | 0          | NA |    |    |    |    |    |    |    |    |
|                    | 3     | 80         | 89 | NA |    |    |    |    |    |    |    |
|                    | 4     | 67         | 63 | 95 | NA |    |    |    |    |    |    |
|                    | 5     | 87         | 95 | 94 | 95 | NA |    |    |    |    |    |
|                    | 8     | 2          | 1  | 92 | 54 | 89 | NA |    |    |    |    |
|                    | 9     | 4          | 0  | 89 | 70 | 88 | 1  | NA |    |    |    |
|                    | 10    | 36         | 32 | 94 | 83 | 90 | 29 | 33 | NA |    |    |
|                    | 11    | 74         | 70 | 94 | 83 | 95 | 60 | 71 | 61 | NA |    |
|                    | 12    | 93         | 92 | 91 | 90 | 87 | 86 | 89 | 87 | 90 | NA |

Supplementary Table 12. Power of MDR to detect both models in the presence of locus heterogeneity with 500 cases and controls

| Proportion of data |    | 0.9 |    |    |    |    |    |    |    |    |    |
|--------------------|----|-----|----|----|----|----|----|----|----|----|----|
| Model              | 1  | 2   | 3  | 4  | 5  | 8  | 9  | 10 | 11 | 12 |    |
| 0.1                | 1  | NA  | 0  | 0  | 0  | 0  | 0  | 0  | 0  | 0  | 0  |
|                    | 2  | 0   | NA | 0  | 0  | 0  | 0  | 0  | 0  | 0  | 0  |
|                    | 3  | 0   | 0  | NA | 0  | 0  | 0  | 0  | 0  | 0  | 0  |
|                    | 4  | 0   | 0  | 0  | NA | 0  | 0  | 0  | 0  | 0  | 0  |
|                    | 5  | 0   | 0  | 0  | 0  | NA | 0  | 0  | 0  | 0  | 0  |
|                    | 8  | 0   | 0  | 0  | 0  | 0  | NA | 0  | 1  | 0  | 0  |
|                    | 9  | 0   | 0  | 0  | 0  | 0  | 0  | NA | 0  | 0  | 0  |
|                    | 10 | 0   | 0  | 0  | 0  | 0  | 0  | 0  | NA | 0  | 0  |
|                    | 11 | 0   | 0  | 0  | 0  | 0  | 0  | 0  | 0  | NA | 0  |
|                    | 12 | 0   | 0  | 0  | 0  | 0  | 0  | 0  | 0  | 0  | NA |

| Proportion of data |    | 0.75 |    |    |    |    |    |    |    |    |    |
|--------------------|----|------|----|----|----|----|----|----|----|----|----|
| Model              | 1  | 2    | 3  | 4  | 5  | 8  | 9  | 10 | 11 | 12 |    |
| 0.25               | 1  | NA   | 0  | 0  | 0  | 0  | 0  | 0  | 0  | 0  | 0  |
|                    | 2  | 0    | NA | 0  | 0  | 0  | 0  | 0  | 0  | 0  | 0  |
|                    | 3  | 0    | 0  | NA | 0  | 0  | 0  | 0  | 1  | 0  | 0  |
|                    | 4  | 0    | 0  | 0  | NA | 0  | 0  | 0  | 0  | 0  | 0  |
|                    | 5  | 0    | 0  | 0  | 0  | NA | 0  | 0  | 0  | 0  | 0  |
|                    | 8  | 0    | 0  | 0  | 0  | 0  | NA | 0  | 0  | 0  | 0  |
|                    | 9  | 0    | 0  | 0  | 0  | 0  | 0  | NA | 0  | 0  | 0  |
|                    | 10 | 0    | 0  | 0  | 0  | 1  | 0  | 0  | NA | 0  | 0  |
|                    | 11 | 0    | 0  | 0  | 0  | 0  | 0  | 0  | 1  | NA | 0  |
|                    | 12 | 0    | 0  | 1  | 0  | 2  | 0  | 0  | 0  | 0  | NA |

| Proportion of data |    | 0.5 |    |    |    |    |    |    |    |    |    |
|--------------------|----|-----|----|----|----|----|----|----|----|----|----|
| Model              | 1  | 2   | 3  | 4  | 5  | 8  | 9  | 10 | 11 | 12 |    |
| 0.5                | 1  | NA  |    |    |    |    |    |    |    |    |    |
|                    | 2  | 0   | NA |    |    |    |    |    |    |    |    |
|                    | 3  | 0   | 0  | NA |    |    |    |    |    |    |    |
|                    | 4  | 0   | 0  | 1  | NA |    |    |    |    |    |    |
|                    | 5  | 0   | 0  | 7  | 7  | NA |    |    |    |    |    |
|                    | 8  | 0   | 0  | 0  | 0  | 0  | NA |    |    |    |    |
|                    | 9  | 0   | 0  | 0  | 0  | 0  | 0  | NA |    |    |    |
|                    | 10 | 0   | 0  | 1  | 0  | 0  | 0  | 0  | NA |    |    |
|                    | 11 | 0   | 0  | 0  | 1  | 3  | 1  | 0  | 3  | NA |    |
|                    | 12 | 0   | 0  | 10 | 3  | 4  | 0  | 1  | 1  | 5  | NA |

Supplementary Table 13. Power of MDR to detect any model locus in the presence of genetic heterogeneity with 500 cases and 1000 controls

| Proportion of data |           | <b>0.9</b> |    |     |     |     |    |    |    |     |     |
|--------------------|-----------|------------|----|-----|-----|-----|----|----|----|-----|-----|
|                    | Model     | 1          | 2  | 3   | 4   | 5   | 8  | 9  | 10 | 11  | 12  |
| <b>0.1</b>         | <b>1</b>  | NA         | 9  | 98  | 99  | 100 | 19 | 17 | 92 | 99  | 96  |
|                    | <b>2</b>  | 3          | NA | 100 | 100 | 100 | 20 | 18 | 94 | 98  | 99  |
|                    | <b>3</b>  | 12         | 9  | NA  | 100 | 100 | 13 | 12 | 90 | 98  | 98  |
|                    | <b>4</b>  | 10         | 6  | 99  | NA  | 100 | 23 | 23 | 89 | 97  | 99  |
|                    | <b>5</b>  | 10         | 11 | 100 | 100 | NA  | 28 | 21 | 95 | 100 | 98  |
|                    | <b>8</b>  | 10         | 18 | 100 | 99  | 100 | NA | 18 | 98 | 99  | 99  |
|                    | <b>9</b>  | 11         | 17 | 98  | 100 | 99  | 24 | NA | 93 | 99  | 99  |
|                    | <b>10</b> | 81         | 80 | 98  | 100 | 98  | 67 | 72 | NA | 99  | 100 |
|                    | <b>11</b> | 94         | 93 | 100 | 100 | 100 | 92 | 95 | 94 | NA  | 99  |
|                    | <b>12</b> | 37         | 29 | 98  | 100 | 99  | 32 | 46 | 96 | 97  | NA  |

| Proportion of data |           | <b>0.75</b> |    |     |     |     |    |    |    |     |     |
|--------------------|-----------|-------------|----|-----|-----|-----|----|----|----|-----|-----|
|                    | Model     | 1           | 2  | 3   | 4   | 5   | 8  | 9  | 10 | 11  | 12  |
| <b>0.25</b>        | <b>1</b>  | NA          | 10 | 97  | 99  | 100 | 17 | 11 | 87 | 100 | 100 |
|                    | <b>2</b>  | 4           | NA | 100 | 100 | 100 | 15 | 12 | 86 | 99  | 97  |
|                    | <b>3</b>  | 15          | 16 | NA  | 100 | 99  | 22 | 27 | 83 | 99  | 99  |
|                    | <b>4</b>  | 22          | 19 | 99  | NA  | 100 | 43 | 34 | 81 | 99  | 99  |
|                    | <b>5</b>  | 24          | 25 | 100 | 100 | NA  | 45 | 43 | 82 | 98  | 98  |
|                    | <b>8</b>  | 10          | 12 | 100 | 100 | 100 | NA | 20 | 84 | 98  | 100 |
|                    | <b>9</b>  | 10          | 10 | 98  | 99  | 98  | 21 | NA | 90 | 100 | 98  |
|                    | <b>10</b> | 64          | 61 | 99  | 99  | 99  | 55 | 67 | NA | 99  | 100 |
|                    | <b>11</b> | 90          | 89 | 99  | 100 | 100 | 84 | 89 | 87 | NA  | 100 |
|                    | <b>12</b> | 46          | 41 | 100 | 100 | 100 | 43 | 59 | 85 | 98  | NA  |

| Proportion of data |           | <b>0.5</b> |    |    |    |    |    |    |    |    |    |
|--------------------|-----------|------------|----|----|----|----|----|----|----|----|----|
|                    | Model     | 1          | 2  | 3  | 4  | 5  | 8  | 9  | 10 | 11 | 12 |
| <b>0.5</b>         | <b>1</b>  | NA         |    |    |    |    |    |    |    |    |    |
|                    | <b>2</b>  | 4          | NA |    |    |    |    |    |    |    |    |
|                    | <b>3</b>  | 93         | 96 | NA |    |    |    |    |    |    |    |
|                    | <b>4</b>  | 85         | 83 | 93 | NA |    |    |    |    |    |    |
|                    | <b>5</b>  | 98         | 99 | 92 | 96 | NA |    |    |    |    |    |
|                    | <b>8</b>  | 13         | 19 | 99 | 85 | 99 | NA |    |    |    |    |
|                    | <b>9</b>  | 10         | 16 | 94 | 90 | 99 | 11 | NA |    |    |    |
|                    | <b>10</b> | 62         | 64 | 99 | 91 | 99 | 72 | 58 | NA |    |    |
|                    | <b>11</b> | 88         | 91 | 99 | 87 | 97 | 93 | 96 | 88 | NA |    |
|                    | <b>12</b> | 96         | 99 | 95 | 91 | 95 | 97 | 97 | 92 | 94 | NA |

Supplementary Table 14. Power of MDR to detect either model in the presence of genetic heterogeneity with 500 cases and 1000 controls

| Proportion of data |    | 0.9 |    |     |     |     |    |    |    |     |     |
|--------------------|----|-----|----|-----|-----|-----|----|----|----|-----|-----|
| Model              | 1  | 2   | 3  | 4   | 5   | 8   | 9  | 10 | 11 | 12  |     |
| 0.1                | 1  | NA  | 1  | 97  | 99  | 100 | 1  | 13 | 92 | 98  | 96  |
|                    | 2  | 0   | NA | 99  | 98  | 100 | 3  | 6  | 94 | 98  | 98  |
|                    | 3  | 0   | 0  | NA  | 100 | 100 | 3  | 5  | 89 | 98  | 98  |
|                    | 4  | 0   | 1  | 99  | NA  | 100 | 3  | 7  | 87 | 97  | 98  |
|                    | 5  | 0   | 3  | 99  | 100 | NA  | 2  | 13 | 93 | 100 | 98  |
|                    | 8  | 0   | 0  | 100 | 99  | 100 | NA | 2  | 97 | 98  | 99  |
|                    | 9  | 0   | 1  | 97  | 100 | 99  | 1  | NA | 90 | 99  | 99  |
|                    | 10 | 2   | 4  | 98  | 100 | 98  | 2  | 14 | NA | 97  | 100 |
|                    | 11 | 1   | 0  | 100 | 100 | 100 | 4  | 5  | 82 | NA  | 98  |
|                    | 12 | 2   | 2  | 97  | 100 | 99  | 7  | 19 | 94 | 97  | NA  |

| Proportion of data |    | 0.75 |    |     |     |     |    |    |    |     |     |
|--------------------|----|------|----|-----|-----|-----|----|----|----|-----|-----|
| Model              | 1  | 2    | 3  | 4   | 5   | 8   | 9  | 10 | 11 | 12  |     |
| 0.25               | 1  | NA   | 1  | 97  | 99  | 100 | 0  | 4  | 84 | 100 | 100 |
|                    | 2  | 0    | NA | 100 | 100 | 100 | 2  | 3  | 85 | 98  | 96  |
|                    | 3  | 11   | 11 | NA  | 100 | 99  | 13 | 16 | 83 | 98  | 98  |
|                    | 4  | 5    | 6  | 99  | NA  | 100 | 20 | 9  | 78 | 98  | 98  |
|                    | 5  | 18   | 17 | 99  | 99  | NA  | 25 | 26 | 79 | 98  | 98  |
|                    | 8  | 1    | 0  | 100 | 100 | 100 | NA | 6  | 79 | 98  | 100 |
|                    | 9  | 0    | 0  | 98  | 99  | 98  | 2  | NA | 82 | 100 | 97  |
|                    | 10 | 7    | 10 | 98  | 99  | 99  | 7  | 15 | NA | 99  | 99  |
|                    | 11 | 17   | 17 | 99  | 99  | 100 | 14 | 15 | 65 | NA  | 100 |
|                    | 12 | 29   | 26 | 100 | 100 | 100 | 17 | 30 | 80 | 98  | NA  |

| Proportion of data |    | 0.5 |    |    |    |    |    |    |    |    |    |
|--------------------|----|-----|----|----|----|----|----|----|----|----|----|
| Model              | 1  | 2   | 3  | 4  | 5  | 8  | 9  | 10 | 11 | 12 |    |
| 0.5                | 1  | NA  |    |    |    |    |    |    |    |    |    |
|                    | 2  | 0   | NA |    |    |    |    |    |    |    |    |
|                    | 3  | 90  | 95 | NA |    |    |    |    |    |    |    |
|                    | 4  | 83  | 79 | 93 | NA |    |    |    |    |    |    |
|                    | 5  | 98  | 99 | 91 | 96 | NA |    |    |    |    |    |
|                    | 8  | 0   | 0  | 97 | 77 | 98 | NA |    |    |    |    |
|                    | 9  | 1   | 1  | 93 | 83 | 99 | 0  | NA |    |    |    |
|                    | 10 | 45  | 44 | 97 | 88 | 98 | 46 | 41 | NA |    |    |
|                    | 11 | 85  | 87 | 96 | 83 | 97 | 84 | 94 | 83 | NA |    |
|                    | 12 | 95  | 99 | 93 | 88 | 92 | 95 | 96 | 89 | 91 | NA |

Supplementary Table 15. Power of MDR to detect both models in the presence of locus heterogeneity with 500 cases and 1000 controls

| Proportion of data |       | 0.9 |    |    |    |    |    |    |    |    |    |
|--------------------|-------|-----|----|----|----|----|----|----|----|----|----|
|                    | Model | 1   | 2  | 3  | 4  | 5  | 8  | 9  | 10 | 11 | 12 |
| 0.1                | 1     | NA  | 0  | 0  | 0  | 0  | 0  | 0  | 0  | 0  | 0  |
|                    | 2     | 0   | NA | 0  | 0  | 0  | 0  | 0  | 0  | 0  | 0  |
|                    | 3     | 0   | 0  | NA | 0  | 0  | 0  | 0  | 0  | 0  | 0  |
|                    | 4     | 0   | 0  | 0  | NA | 0  | 0  | 0  | 0  | 0  | 0  |
|                    | 5     | 0   | 0  | 0  | 0  | NA | 0  | 0  | 0  | 0  | 0  |
|                    | 8     | 0   | 0  | 0  | 0  | 0  | NA | 0  | 0  | 0  | 0  |
|                    | 9     | 0   | 0  | 0  | 0  | 0  | 0  | NA | 0  | 0  | 0  |
|                    | 10    | 0   | 0  | 0  | 0  | 0  | 0  | 0  | NA | 0  | 0  |
|                    | 11    | 0   | 0  | 0  | 0  | 0  | 0  | 0  | 0  | NA | 0  |
|                    | 12    | 0   | 0  | 0  | 0  | 0  | 0  | 0  | 0  | 0  | NA |

| Proportion of data |       | 0.75 |    |    |    |    |    |    |    |    |    |
|--------------------|-------|------|----|----|----|----|----|----|----|----|----|
|                    | Model | 1    | 2  | 3  | 4  | 5  | 8  | 9  | 10 | 11 | 12 |
| 0.25               | 1     | NA   | 0  | 0  | 0  | 0  | 0  | 0  | 0  | 0  | 0  |
|                    | 2     | 0    | NA | 0  | 0  | 0  | 0  | 0  | 0  | 0  | 0  |
|                    | 3     | 0    | 0  | NA | 3  | 0  | 0  | 0  | 0  | 0  | 0  |
|                    | 4     | 0    | 0  | 0  | NA | 1  | 0  | 0  | 0  | 0  | 0  |
|                    | 5     | 0    | 0  | 1  | 0  | NA | 0  | 0  | 0  | 1  | 0  |
|                    | 8     | 0    | 0  | 0  | 0  | 0  | NA | 0  | 0  | 0  | 0  |
|                    | 9     | 0    | 0  | 0  | 0  | 0  | 0  | NA | 0  | 0  | 0  |
|                    | 10    | 0    | 0  | 0  | 0  | 0  | 0  | 0  | NA | 0  | 0  |
|                    | 11    | 0    | 0  | 0  | 0  | 0  | 0  | 0  | 0  | NA | 0  |
|                    | 12    | 0    | 0  | 1  | 1  | 4  | 0  | 1  | 4  | 0  | NA |

| Proportion of data |       | 0.5 |    |    |    |    |    |    |    |    |    |
|--------------------|-------|-----|----|----|----|----|----|----|----|----|----|
|                    | Model | 1   | 2  | 3  | 4  | 5  | 8  | 9  | 10 | 11 | 12 |
| 0.5                | 1     | NA  |    |    |    |    |    |    |    |    |    |
|                    | 2     | 0   | NA |    |    |    |    |    |    |    |    |
|                    | 3     | 0   | 0  | NA |    |    |    |    |    |    |    |
|                    | 4     | 0   | 0  | 4  | NA |    |    |    |    |    |    |
|                    | 5     | 0   | 0  | 22 | 11 | NA |    |    |    |    |    |
|                    | 8     | 0   | 0  | 0  | 0  | 0  | NA |    |    |    |    |
|                    | 9     | 0   | 0  | 0  | 0  | 0  | 0  | NA |    |    |    |
|                    | 10    | 0   | 0  | 2  | 0  | 2  | 0  | 0  | NA |    |    |
|                    | 11    | 0   | 0  | 6  | 1  | 6  | 0  | 0  | 0  | NA |    |
|                    | 12    | 0   | 0  | 22 | 6  | 17 | 0  | 0  | 1  | 15 | NA |

Supplementary Table 16. Power of MDR to detect any model locus in the presence of genetic heterogeneity with 500 cases and 2000 controls

| Proportion of data |           | <b>0.9</b> |    |     |     |     |    |    |    |     |     |
|--------------------|-----------|------------|----|-----|-----|-----|----|----|----|-----|-----|
|                    | Model     | 1          | 2  | 3   | 4   | 5   | 8  | 9  | 10 | 11  | 12  |
| <b>0.1</b>         | <b>1</b>  | NA         | 2  | 99  | 100 | 99  | 15 | 13 | 93 | 100 | 98  |
|                    | <b>2</b>  | 3          | NA | 99  | 100 | 100 | 17 | 8  | 96 | 99  | 100 |
|                    | <b>3</b>  | 5          | 10 | NA  | 100 | 99  | 19 | 11 | 95 | 100 | 99  |
|                    | <b>4</b>  | 5          | 5  | 100 | NA  | 99  | 19 | 17 | 96 | 98  | 99  |
|                    | <b>5</b>  | 7          | 8  | 98  | 100 | NA  | 18 | 20 | 92 | 100 | 99  |
|                    | <b>8</b>  | 6          | 10 | 100 | 100 | 100 | NA | 13 | 90 | 99  | 100 |
|                    | <b>9</b>  | 11         | 8  | 100 | 100 | 100 | 19 | NA | 94 | 99  | 99  |
|                    | <b>10</b> | 83         | 89 | 99  | 98  | 100 | 83 | 81 | NA | 100 | 100 |
|                    | <b>11</b> | 98         | 94 | 100 | 100 | 100 | 93 | 92 | 95 | NA  | 99  |
|                    | <b>12</b> | 27         | 32 | 98  | 100 | 99  | 27 | 49 | 92 | 99  | NA  |

| Proportion of data |           | <b>0.75</b> |    |     |     |     |    |    |    |     |     |
|--------------------|-----------|-------------|----|-----|-----|-----|----|----|----|-----|-----|
|                    | Model     | 1           | 2  | 3   | 4   | 5   | 8  | 9  | 10 | 11  | 12  |
| <b>0.25</b>        | <b>1</b>  | NA          | 5  | 99  | 100 | 99  | 14 | 3  | 93 | 97  | 100 |
|                    | <b>2</b>  | 5           | NA | 100 | 100 | 99  | 14 | 8  | 92 | 99  | 100 |
|                    | <b>3</b>  | 15          | 19 | NA  | 97  | 99  | 30 | 25 | 89 | 99  | 99  |
|                    | <b>4</b>  | 14          | 19 | 98  | NA  | 100 | 35 | 27 | 81 | 96  | 100 |
|                    | <b>5</b>  | 33          | 37 | 97  | 100 | NA  | 47 | 46 | 86 | 98  | 99  |
|                    | <b>8</b>  | 11          | 7  | 100 | 99  | 100 | NA | 16 | 88 | 100 | 98  |
|                    | <b>9</b>  | 6           | 4  | 100 | 100 | 100 | 18 | NA | 91 | 97  | 100 |
|                    | <b>10</b> | 69          | 74 | 100 | 99  | 100 | 63 | 75 | NA | 100 | 100 |
|                    | <b>11</b> | 94          | 98 | 100 | 99  | 100 | 87 | 89 | 93 | NA  | 99  |
|                    | <b>12</b> | 51          | 46 | 100 | 99  | 100 | 49 | 57 | 90 | 100 | NA  |

| Proportion of data |           | <b>0.5</b> |    |     |    |     |    |    |    |    |    |
|--------------------|-----------|------------|----|-----|----|-----|----|----|----|----|----|
|                    | Model     | 1          | 2  | 3   | 4  | 5   | 8  | 9  | 10 | 11 | 12 |
| <b>0.5</b>         | <b>1</b>  | NA         |    |     |    |     |    |    |    |    |    |
|                    | <b>2</b>  | 8          | NA |     |    |     |    |    |    |    |    |
|                    | <b>3</b>  | 96         | 98 | NA  |    |     |    |    |    |    |    |
|                    | <b>4</b>  | 90         | 90 | 94  | NA |     |    |    |    |    |    |
|                    | <b>5</b>  | 99         | 99 | 95  | 96 | NA  |    |    |    |    |    |
|                    | <b>8</b>  | 10         | 14 | 99  | 91 | 99  | NA |    |    |    |    |
|                    | <b>9</b>  | 7          | 7  | 98  | 94 | 99  | 19 | NA |    |    |    |
|                    | <b>10</b> | 73         | 70 | 100 | 95 | 100 | 76 | 80 | NA |    |    |
|                    | <b>11</b> | 94         | 93 | 100 | 85 | 97  | 92 | 95 | 93 | NA |    |
|                    | <b>12</b> | 98         | 99 | 97  | 89 | 91  | 99 | 97 | 95 | 96 | NA |



Supplementary Table 17. Power of MDR to detect either model in the presence of genetic heterogeneity with 500 cases and 2000 controls

| Proportion of data |           | <b>0.9</b> |    |     |     |     |    |    |    |     |     |
|--------------------|-----------|------------|----|-----|-----|-----|----|----|----|-----|-----|
|                    | Model     | 1          | 2  | 3   | 4   | 5   | 8  | 9  | 10 | 11  | 12  |
| <b>0.1</b>         | <b>1</b>  | NA         | 0  | 99  | 100 | 99  | 0  | 4  | 91 | 100 | 98  |
|                    | <b>2</b>  | 0          | NA | 99  | 100 | 100 | 2  | 2  | 96 | 99  | 100 |
|                    | <b>3</b>  | 0          | 0  | NA  | 100 | 99  | 2  | 7  | 95 | 100 | 99  |
|                    | <b>4</b>  | 0          | 0  | 98  | NA  | 99  | 2  | 7  | 95 | 98  | 99  |
|                    | <b>5</b>  | 0          | 2  | 97  | 100 | NA  | 5  | 10 | 92 | 100 | 99  |
|                    | <b>8</b>  | 0          | 1  | 100 | 100 | 100 | NA | 2  | 88 | 99  | 99  |
|                    | <b>9</b>  | 0          | 0  | 99  | 100 | 100 | 1  | NA | 94 | 97  | 99  |
|                    | <b>10</b> | 5          | 3  | 99  | 98  | 100 | 6  | 12 | NA | 100 | 100 |
|                    | <b>11</b> | 1          | 3  | 99  | 100 | 100 | 3  | 1  | 93 | NA  | 98  |
|                    | <b>12</b> | 5          | 6  | 97  | 100 | 99  | 3  | 31 | 91 | 98  | NA  |

| Proportion of data |           | <b>0.75</b> |    |     |     |     |    |    |    |     |     |
|--------------------|-----------|-------------|----|-----|-----|-----|----|----|----|-----|-----|
|                    | Model     | 1           | 2  | 3   | 4   | 5   | 8  | 9  | 10 | 11  | 12  |
| <b>0.25</b>        | <b>1</b>  | NA          | 0  | 99  | 100 | 99  | 0  | 2  | 93 | 97  | 100 |
|                    | <b>2</b>  | 0           | NA | 100 | 98  | 98  | 1  | 2  | 89 | 98  | 100 |
|                    | <b>3</b>  | 15          | 11 | NA  | 97  | 99  | 23 | 15 | 86 | 98  | 98  |
|                    | <b>4</b>  | 8           | 7  | 98  | NA  | 100 | 17 | 12 | 77 | 96  | 100 |
|                    | <b>5</b>  | 25          | 24 | 97  | 100 | NA  | 25 | 30 | 86 | 98  | 98  |
|                    | <b>8</b>  | 0           | 0  | 100 | 99  | 100 | NA | 3  | 85 | 98  | 97  |
|                    | <b>9</b>  | 0           | 0  | 100 | 100 | 100 | 1  | NA | 83 | 96  | 99  |
|                    | <b>10</b> | 9           | 8  | 100 | 99  | 100 | 11 | 22 | NA | 100 | 100 |
|                    | <b>11</b> | 15          | 23 | 100 | 99  | 100 | 13 | 21 | 76 | NA  | 99  |
|                    | <b>12</b> | 35          | 35 | 100 | 99  | 100 | 23 | 38 | 89 | 100 | NA  |

| Proportion of data |           | <b>0.5</b> |    |     |    |     |    |    |    |    |    |
|--------------------|-----------|------------|----|-----|----|-----|----|----|----|----|----|
|                    | Model     | 1          | 2  | 3   | 4  | 5   | 8  | 9  | 10 | 11 | 12 |
| <b>0.5</b>         | <b>1</b>  | NA         |    |     |    |     |    |    |    |    |    |
|                    | <b>2</b>  | 0          | NA |     |    |     |    |    |    |    |    |
|                    | <b>3</b>  | 95         | 98 | NA  |    |     |    |    |    |    |    |
|                    | <b>4</b>  | 89         | 89 | 93  | NA |     |    |    |    |    |    |
|                    | <b>5</b>  | 99         | 98 | 94  | 93 | NA  |    |    |    |    |    |
|                    | <b>8</b>  | 0          | 1  | 98  | 86 | 99  | NA |    |    |    |    |
|                    | <b>9</b>  | 1          | 1  | 98  | 91 | 99  | 0  | NA |    |    |    |
|                    | <b>10</b> | 56         | 55 | 100 | 92 | 100 | 56 | 60 | NA |    |    |
|                    | <b>11</b> | 89         | 91 | 100 | 83 | 96  | 89 | 89 | 88 | NA |    |
|                    | <b>12</b> | 98         | 98 | 97  | 88 | 89  | 99 | 96 | 94 | 96 | NA |

Supplementary Table 18. Power of MDR to detect both models in the presence of locus heterogeneity with 500 cases and 2000 controls

| Proportion of data |    | 0.9 |    |    |    |    |    |    |    |    |    |
|--------------------|----|-----|----|----|----|----|----|----|----|----|----|
| Model              | 1  | 2   | 3  | 4  | 5  | 8  | 9  | 10 | 11 | 12 |    |
| 0.1                | 1  | NA  | 0  | 0  | 0  | 0  | 0  | 0  | 0  | 0  | 0  |
|                    | 2  | 0   | NA | 0  | 0  | 0  | 0  | 0  | 0  | 0  | 0  |
|                    | 3  | 0   | 0  | NA | 0  | 0  | 0  | 0  | 0  | 0  | 0  |
|                    | 4  | 0   | 0  | 0  | NA | 0  | 0  | 0  | 0  | 0  | 0  |
|                    | 5  | 0   | 0  | 0  | 0  | NA | 0  | 0  | 0  | 0  | 0  |
|                    | 8  | 0   | 0  | 0  | 0  | 0  | NA | 0  | 0  | 0  | 0  |
|                    | 9  | 0   | 0  | 0  | 0  | 0  | 0  | NA | 0  | 0  | 0  |
|                    | 10 | 0   | 0  | 0  | 0  | 0  | 0  | 0  | NA | 0  | 0  |
|                    | 11 | 0   | 0  | 0  | 0  | 0  | 0  | 0  | 0  | NA | 0  |
|                    | 12 | 0   | 0  | 0  | 0  | 0  | 0  | 1  | 0  | 0  | NA |

| Proportion of data |    | 0.75 |    |    |    |    |    |    |    |    |    |
|--------------------|----|------|----|----|----|----|----|----|----|----|----|
| Model              | 1  | 2    | 3  | 4  | 5  | 8  | 9  | 10 | 11 | 12 |    |
| 0.25               | 1  | NA   | 0  | 0  | 0  | 0  | 0  | 0  | 0  | 0  | 0  |
|                    | 2  | 0    | NA | 0  | 0  | 0  | 0  | 0  | 0  | 0  | 0  |
|                    | 3  | 0    | 0  | NA | 0  | 0  | 0  | 0  | 1  | 0  | 0  |
|                    | 4  | 0    | 0  | 0  | NA | 1  | 0  | 0  | 0  | 0  | 0  |
|                    | 5  | 0    | 0  | 0  | 0  | NA | 0  | 0  | 1  | 0  | 0  |
|                    | 8  | 0    | 0  | 0  | 0  | 0  | NA | 0  | 0  | 0  | 0  |
|                    | 9  | 0    | 0  | 0  | 0  | 0  | 0  | NA | 0  | 0  | 0  |
|                    | 10 | 0    | 0  | 0  | 0  | 0  | 0  | 0  | NA | 0  | 0  |
|                    | 11 | 0    | 0  | 0  | 0  | 0  | 0  | 0  | 0  | NA | 0  |
|                    | 12 | 0    | 0  | 3  | 2  | 0  | 1  | 1  | 4  | 0  | NA |

| Proportion of data |    | 0.5 |    |    |    |    |    |    |    |    |    |
|--------------------|----|-----|----|----|----|----|----|----|----|----|----|
| Model              | 1  | 2   | 3  | 4  | 5  | 8  | 9  | 10 | 11 | 12 |    |
| 0.5                | 1  | NA  |    |    |    |    |    |    |    |    |    |
|                    | 2  | 0   | NA |    |    |    |    |    |    |    |    |
|                    | 3  | 0   | 0  | NA |    |    |    |    |    |    |    |
|                    | 4  | 0   | 0  | 16 | NA |    |    |    |    |    |    |
|                    | 5  | 0   | 0  | 45 | 11 | NA |    |    |    |    |    |
|                    | 8  | 0   | 0  | 0  | 0  | 0  | NA |    |    |    |    |
|                    | 9  | 0   | 0  | 0  | 0  | 0  | 0  | NA |    |    |    |
|                    | 10 | 0   | 0  | 8  | 3  | 6  | 0  | 0  | NA |    |    |
|                    | 11 | 0   | 0  | 28 | 6  | 14 | 0  | 0  | 3  | NA |    |
|                    | 12 | 0   | 0  | 48 | 14 | 30 | 0  | 0  | 4  | 20 | NA |

Supplementary Table 19. Power of MDR to detect any model locus in the presence of genetic heterogeneity with 1000 cases and controls

| Proportion of data |           | <b>0.9</b> |    |     |     |     |    |    |    |     |     |
|--------------------|-----------|------------|----|-----|-----|-----|----|----|----|-----|-----|
|                    | Model     | 1          | 2  | 3   | 4   | 5   | 8  | 9  | 10 | 11  | 12  |
| <b>0.1</b>         | <b>1</b>  | NA         | 3  | 99  | 100 | 100 | 12 | 10 | 96 | 99  | 97  |
|                    | <b>2</b>  | 5          | NA | 100 | 100 | 100 | 14 | 13 | 97 | 100 | 100 |
|                    | <b>3</b>  | 2          | 4  | NA  | 99  | 100 | 5  | 16 | 96 | 98  | 100 |
|                    | <b>4</b>  | 7          | 6  | 99  | NA  | 99  | 12 | 11 | 97 | 100 | 98  |
|                    | <b>5</b>  | 6          | 12 | 100 | 100 | NA  | 12 | 20 | 98 | 100 | 95  |
|                    | <b>8</b>  | 6          | 7  | 100 | 100 | 100 | NA | 16 | 95 | 98  | 99  |
|                    | <b>9</b>  | 2          | 4  | 100 | 100 | 100 | 10 | NA | 97 | 100 | 98  |
|                    | <b>10</b> | 94         | 96 | 99  | 100 | 100 | 88 | 86 | NA | 98  | 99  |
|                    | <b>11</b> | 96         | 99 | 100 | 100 | 100 | 99 | 97 | 98 | NA  | 100 |
|                    | <b>12</b> | 25         | 21 | 99  | 98  | 100 | 19 | 32 | 92 | 100 | NA  |

| Proportion of data |           | <b>0.75</b> |    |     |     |     |     |    |     |     |    |
|--------------------|-----------|-------------|----|-----|-----|-----|-----|----|-----|-----|----|
|                    | Model     | 1           | 2  | 3   | 4   | 5   | 8   | 9  | 10  | 11  | 12 |
| <b>0.25</b>        | <b>1</b>  | NA          | 3  | 100 | 99  | 96  | 2   | 8  | 100 | 98  | 99 |
|                    | <b>2</b>  | 0           | NA | 100 | 97  | 99  | 3   | 8  | 97  | 100 | 98 |
|                    | <b>3</b>  | 28          | 24 | NA  | 98  | 99  | 33  | 26 | 95  | 100 | 99 |
|                    | <b>4</b>  | 16          | 10 | 100 | NA  | 100 | 33  | 29 | 99  | 99  | 97 |
|                    | <b>5</b>  | 33          | 39 | 100 | 98  | NA  | 67  | 59 | 98  | 98  | 99 |
|                    | <b>8</b>  | 1           | 3  | 100 | 99  | 100 | NA  | 6  | 94  | 100 | 99 |
|                    | <b>9</b>  | 3           | 5  | 100 | 100 | 97  | 8   | NA | 97  | 100 | 98 |
|                    | <b>10</b> | 93          | 95 | 100 | 99  | 100 | 91  | 97 | NA  | 99  | 98 |
|                    | <b>11</b> | 97          | 97 | 100 | 99  | 100 | 100 | 99 | 100 | NA  | 95 |
|                    | <b>12</b> | 57          | 71 | 98  | 99  | 99  | 64  | 70 | 96  | 100 | NA |

| Proportion of data |           | <b>0.5</b> |     |     |    |     |     |    |    |    |    |
|--------------------|-----------|------------|-----|-----|----|-----|-----|----|----|----|----|
|                    | Model     | 1          | 2   | 3   | 4  | 5   | 8   | 9  | 10 | 11 | 12 |
| <b>0.5</b>         | <b>1</b>  | NA         |     |     |    |     |     |    |    |    |    |
|                    | <b>2</b>  | 5          | NA  |     |    |     |     |    |    |    |    |
|                    | <b>3</b>  | 99         | 97  | NA  |    |     |     |    |    |    |    |
|                    | <b>4</b>  | 96         | 93  | 94  | NA |     |     |    |    |    |    |
|                    | <b>5</b>  | 100        | 100 | 98  | 98 | NA  |     |    |    |    |    |
|                    | <b>8</b>  | 4          | 8   | 99  | 99 | 99  | NA  |    |    |    |    |
|                    | <b>9</b>  | 5          | 5   | 97  | 99 | 100 | 8   | NA |    |    |    |
|                    | <b>10</b> | 81         | 81  | 99  | 98 | 96  | 78  | 81 | NA |    |    |
|                    | <b>11</b> | 95         | 98  | 97  | 94 | 98  | 100 | 95 | 97 | NA |    |
|                    | <b>12</b> | 98         | 99  | 100 | 92 | 97  | 99  | 98 | 99 | 98 | NA |

Supplementary Table 20. Power of MDR to detect either model in the presence of genetic heterogeneity with 1000 cases and controls

| Proportion of data |       | <b>0.9</b> |    |     |     |     |    |    |    |     |     |
|--------------------|-------|------------|----|-----|-----|-----|----|----|----|-----|-----|
|                    | Model | 1          | 2  | 3   | 4   | 5   | 8  | 9  | 10 | 11  | 12  |
| <b>0.1</b>         | 1     | NA         | 0  | 99  | 100 | 99  | 1  | 5  | 96 | 99  | 97  |
|                    | 2     | 0          | NA | 100 | 99  | 100 | 4  | 7  | 96 | 100 | 100 |
|                    | 3     | 0          | 1  | NA  | 99  | 100 | 0  | 11 | 96 | 98  | 100 |
|                    | 4     | 0          | 0  | 99  | NA  | 99  | 0  | 8  | 96 | 100 | 97  |
|                    | 5     | 0          | 2  | 100 | 100 | NA  | 3  | 8  | 98 | 99  | 94  |
|                    | 8     | 0          | 1  | 98  | 100 | 100 | NA | 4  | 94 | 98  | 98  |
|                    | 9     | 0          | 0  | 100 | 100 | 100 | 0  | NA | 95 | 100 | 98  |
|                    | 10    | 2          | 2  | 99  | 100 | 100 | 2  | 11 | NA | 96  | 98  |
|                    | 11    | 0          | 0  | 100 | 100 | 100 | 3  | 5  | 97 | NA  | 100 |
|                    | 12    | 2          | 4  | 99  | 98  | 100 | 2  | 14 | 92 | 99  | NA  |

| Proportion of data |       | <b>0.75</b> |    |     |     |     |    |    |    |     |    |
|--------------------|-------|-------------|----|-----|-----|-----|----|----|----|-----|----|
|                    | Model | 1           | 2  | 3   | 4   | 5   | 8  | 9  | 10 | 11  | 12 |
| <b>0.25</b>        | 1     | NA          | 0  | 100 | 99  | 96  | 0  | 6  | 99 | 97  | 98 |
|                    | 2     | 0           | NA | 100 | 97  | 98  | 2  | 7  | 96 | 100 | 98 |
|                    | 3     | 24          | 22 | NA  | 98  | 99  | 30 | 23 | 95 | 100 | 99 |
|                    | 4     | 14          | 10 | 100 | NA  | 100 | 24 | 25 | 97 | 99  | 95 |
|                    | 5     | 33          | 36 | 100 | 98  | NA  | 62 | 51 | 98 | 98  | 99 |
|                    | 8     | 0           | 0  | 100 | 99  | 100 | NA | 5  | 94 | 100 | 97 |
|                    | 9     | 0           | 0  | 100 | 100 | 97  | 0  | NA | 97 | 99  | 97 |
|                    | 10    | 13          | 8  | 100 | 99  | 100 | 14 | 13 | NA | 99  | 98 |
|                    | 11    | 31          | 32 | 100 | 99  | 100 | 37 | 34 | 99 | NA  | 95 |
|                    | 12    | 53          | 68 | 98  | 99  | 98  | 59 | 65 | 94 | 100 | NA |

| Proportion of data |       | <b>0.5</b> |     |     |    |     |    |    |    |    |    |
|--------------------|-------|------------|-----|-----|----|-----|----|----|----|----|----|
|                    | Model | 1          | 2   | 3   | 4  | 5   | 8  | 9  | 10 | 11 | 12 |
| <b>0.5</b>         | 1     | NA         |     |     |    |     |    |    |    |    |    |
|                    | 2     | 0          | NA  |     |    |     |    |    |    |    |    |
|                    | 3     | 99         | 96  | NA  |    |     |    |    |    |    |    |
|                    | 4     | 96         | 91  | 93  | NA |     |    |    |    |    |    |
|                    | 5     | 100        | 100 | 97  | 98 | NA  |    |    |    |    |    |
|                    | 8     | 0          | 0   | 99  | 98 | 99  | NA |    |    |    |    |
|                    | 9     | 0          | 0   | 96  | 98 | 100 | 0  | NA |    |    |    |
|                    | 10    | 68         | 71  | 98  | 97 | 96  | 55 | 63 | NA |    |    |
|                    | 11    | 93         | 97  | 96  | 90 | 96  | 99 | 92 | 96 | NA |    |
|                    | 12    | 97         | 98  | 100 | 91 | 96  | 99 | 98 | 99 | 93 | NA |

Supplementary Table 21. Power of MDR to detect both models in the presence of locus heterogeneity with 1000 cases and controls

| Proportion of data |       | 0.5 |    |    |    |    |    |    |    |    |    |
|--------------------|-------|-----|----|----|----|----|----|----|----|----|----|
|                    | Model | 1   | 2  | 3  | 4  | 5  | 8  | 9  | 10 | 11 | 12 |
| 0.1                | 1     | NA  | 0  | 0  | 0  | 0  | 0  | 0  | 0  | 0  | 0  |
|                    | 2     | 0   | NA | 0  | 0  | 0  | 0  | 0  | 0  | 0  | 0  |
|                    | 3     | 0   | 0  | NA | 0  | 0  | 0  | 0  | 0  | 0  | 0  |
|                    | 4     | 0   | 0  | 0  | NA | 0  | 0  | 0  | 0  | 0  | 0  |
|                    | 5     | 0   | 0  | 0  | 0  | NA | 0  | 0  | 0  | 0  | 0  |
|                    | 8     | 0   | 0  | 0  | 0  | 0  | NA | 0  | 1  | 0  | 0  |
|                    | 9     | 0   | 0  | 0  | 0  | 0  | 0  | NA | 0  | 0  | 0  |
|                    | 10    | 0   | 0  | 0  | 0  | 0  | 0  | 0  | NA | 0  | 0  |
|                    | 11    | 0   | 0  | 0  | 0  | 0  | 0  | 0  | 0  | NA | 0  |
|                    | 12    | 0   | 0  | 0  | 0  | 0  | 0  | 0  | 0  | 0  | NA |

| Proportion of data |       | 0.5 |    |    |    |    |    |    |    |    |    |
|--------------------|-------|-----|----|----|----|----|----|----|----|----|----|
|                    | Model | 1   | 2  | 3  | 4  | 5  | 8  | 9  | 10 | 11 | 12 |
| 0.25               | 1     | NA  | 0  | 0  | 0  | 0  | 0  | 0  | 0  | 0  | 0  |
|                    | 2     | 0   | NA | 0  | 0  | 0  | 0  | 0  | 0  | 0  | 0  |
|                    | 3     | 0   | 0  | NA | 8  | 2  | 0  | 0  | 5  | 0  | 5  |
|                    | 4     | 0   | 0  | 0  | NA | 6  | 0  | 0  | 2  | 2  | 1  |
|                    | 5     | 0   | 0  | 0  | 9  | NA | 0  | 0  | 6  | 3  | 6  |
|                    | 8     | 0   | 0  | 0  | 0  | 0  | NA | 0  | 0  | 0  | 0  |
|                    | 9     | 0   | 0  | 0  | 0  | 0  | 0  | NA | 0  | 0  | 0  |
|                    | 10    | 0   | 0  | 0  | 0  | 1  | 0  | 0  | NA | 0  | 2  |
|                    | 11    | 0   | 0  | 0  | 0  | 0  | 0  | 0  | 0  | NA | 0  |
|                    | 12    | 0   | 0  | 4  | 6  | 6  | 1  | 3  | 8  | 4  | NA |

| Proportion of data |       | 0.5 |    |    |    |    |    |    |    |    |    |
|--------------------|-------|-----|----|----|----|----|----|----|----|----|----|
|                    | Model | 1   | 2  | 3  | 4  | 5  | 8  | 9  | 10 | 11 | 12 |
| 0.5                | 1     | NA  |    |    |    |    |    |    |    |    |    |
|                    | 2     | 0   | NA |    |    |    |    |    |    |    |    |
|                    | 3     | 0   | 0  | NA |    |    |    |    |    |    |    |
|                    | 4     | 0   | 0  | 14 | NA |    |    |    |    |    |    |
|                    | 5     | 0   | 0  | 60 | 25 | NA |    |    |    |    |    |
|                    | 8     | 0   | 0  | 0  | 0  | 0  | NA |    |    |    |    |
|                    | 9     | 0   | 0  | 0  | 0  | 1  | 0  | NA |    |    |    |
|                    | 10    | 0   | 0  | 10 | 8  | 7  | 0  | 0  | NA |    |    |
|                    | 11    | 0   | 0  | 25 | 21 | 30 | 0  | 0  | 1  | NA |    |
|                    | 12    | 0   | 0  | 72 | 28 | 53 | 0  | 0  | 11 | 30 | NA |

Supplementary Table 22. Power of MDR to detect any model locus in the presence of genetic heterogeneity with 1000 cases and 2000 controls

| Proportion of data |              | <b>0.9</b> |          |          |          |          |          |          |           |           |           |
|--------------------|--------------|------------|----------|----------|----------|----------|----------|----------|-----------|-----------|-----------|
|                    | <b>Model</b> | <b>1</b>   | <b>2</b> | <b>3</b> | <b>4</b> | <b>5</b> | <b>8</b> | <b>9</b> | <b>10</b> | <b>11</b> | <b>12</b> |
| <b>0.1</b>         | <b>1</b>     | NA         | 4        | 99       | 99       | 100      | 3        | 9        | 100       | 99        | 98        |
|                    | <b>2</b>     | 2          | NA       | 100      | 100      | 99       | 6        | 13       | 94        | 99        | 100       |
|                    | <b>3</b>     | 3          | 1        | NA       | 100      | 100      | 6        | 13       | 95        | 100       | 99        |
|                    | <b>4</b>     | 1          | 3        | 99       | NA       | 99       | 6        | 15       | 97        | 100       | 98        |
|                    | <b>5</b>     | 3          | 4        | 100      | 99       | NA       | 6        | 14       | 98        | 98        | 100       |
|                    | <b>8</b>     | 3          | 4        | 100      | 99       | 100      | NA       | 14       | 99        | 99        | 100       |
|                    | <b>9</b>     | 1          | 1        | 99       | 100      | 99       | 8        | NA       | 98        | 99        | 96        |
|                    | <b>10</b>    | 91         | 92       | 100      | 97       | 99       | 92       | 98       | NA        | 99        | 100       |
|                    | <b>11</b>    | 100        | 100      | 100      | 99       | 100      | 100      | 97       | 100       | NA        | 99        |
|                    | <b>12</b>    | 12         | 16       | 97       | 100      | 99       | 8        | 31       | 98        | 98        | NA        |

| Proportion of data |              | <b>0.75</b> |          |          |          |          |          |          |           |           |           |
|--------------------|--------------|-------------|----------|----------|----------|----------|----------|----------|-----------|-----------|-----------|
|                    | <b>Model</b> | <b>1</b>    | <b>2</b> | <b>3</b> | <b>4</b> | <b>5</b> | <b>8</b> | <b>9</b> | <b>10</b> | <b>11</b> | <b>12</b> |
| <b>0.25</b>        | <b>1</b>     | NA          | 1        | 99       | 98       | 99       | 6        | 6        | 96        | 98        | 99        |
|                    | <b>2</b>     | 0           | NA       | 100      | 98       | 100      | 4        | 5        | 97        | 99        | 98        |
|                    | <b>3</b>     | 22          | 17       | NA       | 99       | 100      | 28       | 26       | 95        | 99        | 99        |
|                    | <b>4</b>     | 16          | 15       | 100      | NA       | 100      | 29       | 27       | 96        | 98        | 98        |
|                    | <b>5</b>     | 31          | 35       | 98       | 99       | NA       | 53       | 43       | 97        | 99        | 99        |
|                    | <b>8</b>     | 4           | 3        | 100      | 100      | 100      | NA       | 11       | 98        | 100       | 99        |
|                    | <b>9</b>     | 4           | 4        | 100      | 99       | 100      | 6        | NA       | 94        | 100       | 98        |
|                    | <b>10</b>    | 92          | 89       | 99       | 100      | 99       | 85       | 94       | NA        | 100       | 98        |
|                    | <b>11</b>    | 94          | 98       | 100      | 100      | 100      | 94       | 98       | 97        | NA        | 100       |
|                    | <b>12</b>    | 59          | 57       | 100      | 99       | 99       | 52       | 70       | 96        | 99        | NA        |

| Proportion of data |              | <b>0.5</b> |          |          |          |          |          |          |           |           |           |
|--------------------|--------------|------------|----------|----------|----------|----------|----------|----------|-----------|-----------|-----------|
|                    | <b>Model</b> | <b>1</b>   | <b>2</b> | <b>3</b> | <b>4</b> | <b>5</b> | <b>8</b> | <b>9</b> | <b>10</b> | <b>11</b> | <b>12</b> |
| <b>0.5</b>         | <b>1</b>     | NA         |          |          |          |          |          |          |           |           |           |
|                    | <b>2</b>     | 3          | NA       |          |          |          |          |          |           |           |           |
|                    | <b>3</b>     | 100        | 100      | NA       |          |          |          |          |           |           |           |
|                    | <b>4</b>     | 97         | 100      | 100      | NA       |          |          |          |           |           |           |
|                    | <b>5</b>     | 99         | 100      | 99       | 100      | NA       |          |          |           |           |           |
|                    | <b>8</b>     | 3          | 5        | 98       | 97       | 98       | NA       |          |           |           |           |
|                    | <b>9</b>     | 5          | 1        | 100      | 99       | 100      | 5        | NA       |           |           |           |
|                    | <b>10</b>    | 90         | 84       | 97       | 100      | 100      | 83       | 90       | NA        |           |           |
|                    | <b>11</b>    | 99         | 99       | 99       | 96       | 100      | 100      | 98       | 94        | NA        |           |
|                    | <b>12</b>    | 100        | 99       | 99       | 95       | 98       | 99       | 99       | 100       | 98        | NA        |

Supplementary Table 23. Power of MDR to detect either model in the presence of genetic heterogeneity with 1000 cases and 2000 controls

| Proportion of data |       | 0.9 |    |     |     |     |    |    |     |     |     |
|--------------------|-------|-----|----|-----|-----|-----|----|----|-----|-----|-----|
|                    | Model | 1   | 2  | 3   | 4   | 5   | 8  | 9  | 10  | 11  | 12  |
| 0.1                | 1     | NA  | 0  | 99  | 99  | 100 | 0  | 3  | 100 | 99  | 98  |
|                    | 2     | 0   | NA | 100 | 100 | 99  | 1  | 6  | 94  | 99  | 100 |
|                    | 3     | 0   | 0  | NA  | 100 | 100 | 2  | 10 | 95  | 99  | 98  |
|                    | 4     | 0   | 0  | 99  | NA  | 99  | 0  | 10 | 96  | 100 | 97  |
|                    | 5     | 0   | 2  | 100 | 99  | NA  | 0  | 11 | 98  | 98  | 100 |
|                    | 8     | 0   | 1  | 100 | 99  | 99  | NA | 10 | 98  | 98  | 100 |
|                    | 9     | 0   | 0  | 98  | 100 | 98  | 0  | NA | 98  | 99  | 96  |
|                    | 10    | 1   | 2  | 99  | 97  | 99  | 1  | 14 | NA  | 99  | 98  |
|                    | 11    | 0   | 2  | 100 | 99  | 99  | 1  | 3  | 100 | NA  | 97  |
|                    | 12    | 4   | 6  | 97  | 99  | 99  | 1  | 23 | 95  | 97  | NA  |

| Proportion of data |       | 0.75 |    |     |     |     |    |    |    |     |     |
|--------------------|-------|------|----|-----|-----|-----|----|----|----|-----|-----|
|                    | Model | 1    | 2  | 3   | 4   | 5   | 8  | 9  | 10 | 11  | 12  |
| 0.25               | 1     | NA   | 0  | 99  | 98  | 99  | 0  | 1  | 96 | 96  | 99  |
|                    | 2     | 0    | NA | 100 | 98  | 98  | 0  | 3  | 95 | 99  | 98  |
|                    | 3     | 19   | 14 | NA  | 99  | 100 | 22 | 21 | 95 | 98  | 99  |
|                    | 4     | 10   | 9  | 99  | NA  | 100 | 17 | 22 | 95 | 98  | 97  |
|                    | 5     | 28   | 32 | 98  | 99  | NA  | 45 | 37 | 96 | 99  | 98  |
|                    | 8     | 0    | 0  | 100 | 100 | 100 | NA | 2  | 98 | 100 | 98  |
|                    | 9     | 0    | 0  | 100 | 99  | 100 | 2  | NA | 92 | 99  | 98  |
|                    | 10    | 8    | 8  | 99  | 100 | 98  | 14 | 12 | NA | 99  | 98  |
|                    | 11    | 20   | 26 | 100 | 100 | 99  | 21 | 25 | 94 | NA  | 100 |
|                    | 12    | 49   | 49 | 100 | 99  | 98  | 46 | 66 | 95 | 98  | NA  |

| Proportion of data |       | 0.5 |     |     |     |     |     |    |    |    |    |
|--------------------|-------|-----|-----|-----|-----|-----|-----|----|----|----|----|
|                    | Model | 1   | 2   | 3   | 4   | 5   | 8   | 9  | 10 | 11 | 12 |
| 0.5                | 1     | NA  |     |     |     |     |     |    |    |    |    |
|                    | 2     | 0   | NA  |     |     |     |     |    |    |    |    |
|                    | 3     | 100 | 100 | NA  |     |     |     |    |    |    |    |
|                    | 4     | 97  | 99  | 100 | NA  |     |     |    |    |    |    |
|                    | 5     | 99  | 99  | 99  | 100 | NA  |     |    |    |    |    |
|                    | 8     | 0   | 0   | 98  | 96  | 98  | NA  |    |    |    |    |
|                    | 9     | 0   | 0   | 99  | 99  | 100 | 0   | NA |    |    |    |
|                    | 10    | 78  | 72  | 97  | 99  | 100 | 73  | 79 | NA |    |    |
|                    | 11    | 97  | 98  | 99  | 95  | 100 | 100 | 97 | 93 | NA |    |
|                    | 12    | 99  | 99  | 99  | 94  | 98  | 99  | 98 | 99 | 98 | NA |

Supplementary Table 24. Power of MDR to detect both models in the presence of locus heterogeneity with 1000 cases and 2000 controls

| Proportion of data |       | 0.9 |    |    |    |    |    |    |    |    |    |
|--------------------|-------|-----|----|----|----|----|----|----|----|----|----|
|                    | Model | 1   | 2  | 3  | 4  | 5  | 8  | 9  | 10 | 11 | 12 |
| 0.1                | 1     | NA  | 0  | 0  | 0  | 0  | 0  | 0  | 0  | 0  | 0  |
|                    | 2     | 0   | NA | 0  | 0  | 0  | 0  | 0  | 0  | 0  | 0  |
|                    | 3     | 0   | 0  | NA | 0  | 0  | 0  | 0  | 0  | 0  | 0  |
|                    | 4     | 0   | 0  | 0  | NA | 0  | 0  | 0  | 0  | 0  | 0  |
|                    | 5     | 0   | 0  | 0  | 0  | NA | 0  | 0  | 0  | 0  | 0  |
|                    | 8     | 0   | 0  | 0  | 0  | 0  | NA | 0  | 0  | 0  | 0  |
|                    | 9     | 0   | 0  | 0  | 0  | 0  | 0  | NA | 0  | 0  | 0  |
|                    | 10    | 0   | 0  | 0  | 0  | 0  | 0  | 0  | NA | 0  | 0  |
|                    | 11    | 0   | 0  | 0  | 0  | 0  | 0  | 0  | 0  | NA | 0  |
|                    | 12    | 0   | 0  | 0  | 0  | 0  | 0  | 0  | 0  | 0  | NA |

| Proportion of data |       | 0.75 |    |    |    |    |    |    |    |    |    |
|--------------------|-------|------|----|----|----|----|----|----|----|----|----|
|                    | Model | 1    | 2  | 3  | 4  | 5  | 8  | 9  | 10 | 11 | 12 |
| 0.25               | 1     | NA   | 0  | 0  | 0  | 0  | 0  | 0  | 0  | 0  | 0  |
|                    | 2     | 0    | NA | 0  | 0  | 0  | 0  | 0  | 0  | 0  | 0  |
|                    | 3     | 0    | 0  | NA | 4  | 1  | 0  | 0  | 1  | 3  | 7  |
|                    | 4     | 0    | 0  | 0  | NA | 3  | 0  | 0  | 0  | 0  | 0  |
|                    | 5     | 0    | 0  | 0  | 2  | NA | 0  | 0  | 2  | 1  | 2  |
|                    | 8     | 0    | 0  | 0  | 0  | 0  | NA | 0  | 0  | 0  | 0  |
|                    | 9     | 0    | 0  | 0  | 0  | 0  | 0  | NA | 0  | 0  | 0  |
|                    | 10    | 0    | 0  | 1  | 1  | 0  | 0  | 0  | NA | 0  | 0  |
|                    | 11    | 0    | 0  | 0  | 0  | 2  | 0  | 0  | 1  | NA | 0  |
|                    | 12    | 0    | 0  | 1  | 7  | 3  | 0  | 2  | 6  | 2  | NA |

| Proportion of data |       | 0.5 |    |    |    |    |    |    |    |    |    |
|--------------------|-------|-----|----|----|----|----|----|----|----|----|----|
|                    | Model | 1   | 2  | 3  | 4  | 5  | 8  | 9  | 10 | 11 | 12 |
| 0.5                | 1     | NA  |    |    |    |    |    |    |    |    |    |
|                    | 2     | 0   | NA |    |    |    |    |    |    |    |    |
|                    | 3     | 0   | 0  | NA |    |    |    |    |    |    |    |
|                    | 4     | 0   | 0  | 33 | NA |    |    |    |    |    |    |
|                    | 5     | 0   | 0  | 77 | 50 | NA |    |    |    |    |    |
|                    | 8     | 0   | 0  | 0  | 0  | 0  | NA |    |    |    |    |
|                    | 9     | 0   | 0  | 0  | 0  | 0  | 0  | NA |    |    |    |
|                    | 10    | 0   | 0  | 27 | 22 | 24 | 0  | 0  | NA |    |    |
|                    | 11    | 0   | 0  | 43 | 48 | 56 | 0  | 0  | 6  | NA |    |
|                    | 12    | 0   | 0  | 82 | 54 | 80 | 0  | 0  | 18 | 59 | NA |



Supplementary Table 25. Power of MDR to detect any model locus in the presence of genetic heterogeneity with 1000 cases and 4000 controls

| Proportion of data |           | <b>0.9</b> |    |     |    |     |    |    |     |     |    |
|--------------------|-----------|------------|----|-----|----|-----|----|----|-----|-----|----|
|                    | Model     | 1          | 2  | 3   | 4  | 5   | 8  | 9  | 10  | 11  | 12 |
| <b>0.1</b>         | <b>1</b>  | NA         | 2  | 100 | 99 | 99  | 4  | 10 | 96  | 99  | 99 |
|                    | <b>2</b>  | 1          | NA | 100 | 99 | 100 | 3  | 14 | 99  | 99  | 99 |
|                    | <b>3</b>  | 0          | 1  | NA  | 99 | 96  | 3  | 9  | 99  | 99  | 98 |
|                    | <b>4</b>  | 4          | 1  | 100 | NA | 95  | 3  | 19 | 94  | 100 | 96 |
|                    | <b>5</b>  | 0          | 1  | 100 | 99 | NA  | 4  | 17 | 99  | 100 | 99 |
|                    | <b>8</b>  | 3          | 1  | 100 | 99 | 98  | NA | 14 | 100 | 99  | 98 |
|                    | <b>9</b>  | 2          | 6  | 100 | 98 | 100 | 8  | NA | 96  | 96  | 95 |
|                    | <b>10</b> | 96         | 97 | 100 | 99 | 97  | 96 | 98 | NA  | 0   | 0  |
|                    | <b>11</b> | 96         | 98 | 100 | 99 | 99  | 97 | 96 | 0   | NA  | 0  |
|                    | <b>12</b> | 11         | 9  | 99  | 98 | 100 | 8  | 35 | 100 | 100 | NA |

| Proportion of data |           | <b>0.75</b> |    |     |     |     |    |     |     |     |     |
|--------------------|-----------|-------------|----|-----|-----|-----|----|-----|-----|-----|-----|
|                    | Model     | 1           | 2  | 3   | 4   | 5   | 8  | 9   | 10  | 11  | 12  |
| <b>0.25</b>        | <b>1</b>  | NA          | 5  | 100 | 99  | 99  | 36 | 26  | 99  | 98  | 99  |
|                    | <b>2</b>  | 2           | NA | 100 | 99  | 99  | 29 | 28  | 96  | 99  | 97  |
|                    | <b>3</b>  | 29          | 25 | NA  | 100 | 99  | 61 | 42  | 96  | 98  | 100 |
|                    | <b>4</b>  | 15          | 11 | 100 | NA  | 99  | 8  | 6   | 98  | 99  | 100 |
|                    | <b>5</b>  | 36          | 46 | 100 | 100 | NA  | 94 | 94  | 98  | 99  | 98  |
|                    | <b>8</b>  | 1           | 2  | 100 | 100 | 100 | NA | 98  | 97  | 100 | 98  |
|                    | <b>9</b>  | 1           | 3  | 100 | 100 | 98  | 96 | NA  | 96  | 98  | 100 |
|                    | <b>10</b> | 97          | 95 | 100 | 99  | 100 | 57 | 61  | NA  | 0   | 0   |
|                    | <b>11</b> | 95          | 97 | 100 | 0   | 0   | 0  | 0   | 0   | NA  | 0   |
|                    | <b>12</b> | 61          | 69 | 100 | 100 | 6   | 5  | 100 | 100 | 100 | NA  |

| Proportion of data |           | <b>0.5</b> |     |     |     |     |    |    |    |    |    |
|--------------------|-----------|------------|-----|-----|-----|-----|----|----|----|----|----|
|                    | Model     | 1          | 2   | 3   | 4   | 5   | 8  | 9  | 10 | 11 | 12 |
| <b>0.5</b>         | <b>1</b>  | NA         |     |     |     |     |    |    |    |    |    |
|                    | <b>2</b>  | 1          | NA  |     |     |     |    |    |    |    |    |
|                    | <b>3</b>  | 100        | 100 | NA  |     |     |    |    |    |    |    |
|                    | <b>4</b>  | 99         | 99  | 98  | NA  |     |    |    |    |    |    |
|                    | <b>5</b>  | 100        | 100 | 100 | 99  | NA  |    |    |    |    |    |
|                    | <b>8</b>  | 3          | 1   | 100 | 99  | 100 | NA |    |    |    |    |
|                    | <b>9</b>  | 6          | 2   | 99  | 96  | 100 | 99 | NA |    |    |    |
|                    | <b>10</b> | 100        | 88  | 93  | 97  | 90  | 96 | 99 | NA |    |    |
|                    | <b>11</b> | 100        | 98  | 100 | 0   | 0   | 0  | 0  | 0  | NA |    |
|                    | <b>12</b> | 98         | 0   | 0   | 100 | 6   | 99 | 89 | 95 | 0  | NA |

Supplementary Table 26. Power of MDR to detect either model in the presence of genetic heterogeneity with 1000 cases and 4000 controls

| Proportion of data |       | <b>0.9</b> |    |     |    |     |    |    |     |     |    |
|--------------------|-------|------------|----|-----|----|-----|----|----|-----|-----|----|
|                    | Model | 1          | 2  | 3   | 4  | 5   | 8  | 9  | 10  | 11  | 12 |
| <b>0.1</b>         | 1     | NA         | 0  | 100 | 99 | 99  | 0  | 9  | 95  | 99  | 99 |
|                    | 2     | 0          | NA | 100 | 99 | 100 | 1  | 10 | 99  | 99  | 99 |
|                    | 3     | 0          | 0  | NA  | 98 | 96  | 0  | 5  | 98  | 99  | 98 |
|                    | 4     | 0          | 0  | 100 | NA | 95  | 1  | 12 | 93  | 98  | 96 |
|                    | 5     | 0          | 0  | 99  | 99 | NA  | 3  | 13 | 99  | 100 | 99 |
|                    | 8     | 0          | 0  | 100 | 99 | 98  | NA | 9  | 100 | 98  | 97 |
|                    | 9     | 0          | 1  | 100 | 98 | 100 | 0  | NA | 96  | 96  | 93 |
|                    | 10    | 0          | 3  | 100 | 99 | 96  | 7  | 10 | NA  | 0   | 0  |
|                    | 11    | 2          | 5  | 100 | 99 | 99  | 1  | 2  | 0   | NA  | 0  |
|                    | 12    | 1          | 2  | 99  | 98 | 100 | 3  | 24 | 100 | 100 | NA |

| Proportion of data |       | <b>0.75</b> |    |     |     |     |    |    |     |     |     |
|--------------------|-------|-------------|----|-----|-----|-----|----|----|-----|-----|-----|
|                    | Model | 1           | 2  | 3   | 4   | 5   | 8  | 9  | 10  | 11  | 12  |
| <b>0.25</b>        | 1     | NA          | 0  | 100 | 99  | 99  | 26 | 20 | 98  | 98  | 99  |
|                    | 2     | 0           | NA | 100 | 99  | 99  | 19 | 21 | 96  | 99  | 97  |
|                    | 3     | 22          | 23 | NA  | 100 | 99  | 52 | 36 | 95  | 97  | 100 |
|                    | 4     | 9           | 8  | 99  | NA  | 99  | 0  | 4  | 96  | 99  | 99  |
|                    | 5     | 34          | 38 | 99  | 100 | NA  | 20 | 27 | 98  | 98  | 98  |
|                    | 8     | 0           | 0  | 100 | 99  | 100 | NA | 28 | 96  | 100 | 98  |
|                    | 9     | 1           | 0  | 100 | 100 | 98  | 30 | NA | 96  | 96  | 100 |
|                    | 10    | 14          | 8  | 100 | 99  | 100 | 47 | 55 | NA  | 0   | 0   |
|                    | 11    | 20          | 27 | 100 | 0   | 0   | 0  | 0  | 0   | NA  | 0   |
|                    | 12    | 57          | 63 | 98  | 100 | 0   | 4  | 99 | 100 | 99  | NA  |

| Proportion of data |       | <b>0.5</b> |     |     |    |     |    |    |    |    |    |
|--------------------|-------|------------|-----|-----|----|-----|----|----|----|----|----|
|                    | Model | 1          | 2   | 3   | 4  | 5   | 8  | 9  | 10 | 11 | 12 |
| <b>0.5</b>         | 1     | NA         |     |     |    |     |    |    |    |    |    |
|                    | 2     | 0          | NA  |     |    |     |    |    |    |    |    |
|                    | 3     | 99         | 100 | NA  |    |     |    |    |    |    |    |
|                    | 4     | 99         | 99  | 98  | NA |     |    |    |    |    |    |
|                    | 5     | 100        | 99  | 100 | 99 | NA  |    |    |    |    |    |
|                    | 8     | 0          | 0   | 100 | 96 | 99  | NA |    |    |    |    |
|                    | 9     | 1          | 2   | 98  | 92 | 100 | 99 | NA |    |    |    |
|                    | 10    | 100        | 79  | 88  | 97 | 87  | 95 | 99 | NA |    |    |
|                    | 11    | 100        | 98  | 100 | 0  | 0   | 0  | 0  | 0  | NA |    |
|                    | 12    | 98         | 0   | 0   | 98 | 0   | 99 | 84 | 95 | 0  | NA |

Supplementary Table 27. Power of MDR to detect both models in the presence of locus heterogeneity with 1000 cases and 4000 controls

| Proportion of data |    | 0.9 |    |    |    |    |    |    |    |    |    |
|--------------------|----|-----|----|----|----|----|----|----|----|----|----|
| Model              | 1  | 2   | 3  | 4  | 5  | 8  | 9  | 10 | 11 | 12 |    |
| 0.1                | 1  | NA  | 0  | 0  | 0  | 0  | 0  | 0  | 0  | 0  | 0  |
|                    | 2  | 0   | NA | 0  | 0  | 0  | 0  | 0  | 0  | 0  | 0  |
|                    | 3  | 0   | 0  | NA | 0  | 0  | 0  | 0  | 0  | 0  | 0  |
|                    | 4  | 0   | 0  | 0  | NA | 0  | 0  | 0  | 0  | 0  | 0  |
|                    | 5  | 0   | 0  | 0  | 0  | NA | 0  | 0  | 0  | 0  | 0  |
|                    | 8  | 0   | 0  | 0  | 0  | 0  | NA | 0  | 0  | 0  | 0  |
|                    | 9  | 0   | 0  | 0  | 0  | 0  | 0  | NA | 0  | 0  | 0  |
|                    | 10 | 0   | 0  | 0  | 1  | 0  | 0  | 0  | NA | 0  | 0  |
|                    | 11 | 0   | 0  | 0  | 0  | 0  | 0  | 0  | 0  | NA | 0  |
|                    | 12 | 0   | 0  | 0  | 0  | 0  | 0  | 0  | 0  | 0  | NA |

| Proportion of data |    | 0.75 |    |    |    |    |    |    |    |    |    |
|--------------------|----|------|----|----|----|----|----|----|----|----|----|
| Model              | 1  | 2    | 3  | 4  | 5  | 8  | 9  | 10 | 11 | 12 |    |
| 0.25               | 1  | NA   | 0  | 0  | 0  | 3  | 0  | 0  | 7  | 5  | 5  |
|                    | 2  | 0    | NA | 0  | 6  | 2  | 0  | 0  | 0  | 0  | 0  |
|                    | 3  | 0    | 0  | NA | 5  | 0  | 0  | 0  | 3  | 1  | 3  |
|                    | 4  | 0    | 0  | 0  | NA | 1  | 0  | 0  | 0  | 0  | 0  |
|                    | 5  | 0    | 0  | 0  | 0  | NA | 0  | 0  | 0  | 0  | 0  |
|                    | 8  | 0    | 0  | 0  | 2  | 1  | NA | 0  | 0  | 0  | 0  |
|                    | 9  | 0    | 0  | 0  | 2  | 2  | 0  | NA | 3  | 5  | 0  |
|                    | 10 | 0    | 0  | 0  | 4  | 4  | 0  | 1  | NA | 0  | 0  |
|                    | 11 | 0    | 0  | 0  | 0  | 0  | 0  | 0  | 0  | NA | 0  |
|                    | 12 | 0    | 0  | 2  | 0  | 0  | 0  | 0  | 0  | 0  | NA |

| Proportion of data |    | 0.5 |    |    |    |    |    |    |    |    |    |
|--------------------|----|-----|----|----|----|----|----|----|----|----|----|
| Model              | 1  | 2   | 3  | 4  | 5  | 8  | 9  | 10 | 11 | 12 |    |
| 0.5                | 1  | NA  |    |    |    |    |    |    |    |    |    |
|                    | 2  | 0   | NA |    |    |    |    |    |    |    |    |
|                    | 3  | 86  | 0  | NA |    |    |    |    |    |    |    |
|                    | 4  | 63  | 0  | 0  | NA |    |    |    |    |    |    |
|                    | 5  | 0   | 0  | 0  | 0  | NA |    |    |    |    |    |
|                    | 8  | 0   | 0  | 0  | 31 | 69 | NA |    |    |    |    |
|                    | 9  | 0   | 0  | 57 | 57 | 90 | 0  | NA |    |    |    |
|                    | 10 | 43  | 0  | 0  | 65 | 0  | 6  | 32 | NA |    |    |
|                    | 11 | 0   | 0  | 95 | 0  | 0  | 0  | 0  | 0  | NA |    |
|                    | 12 | 1   | 0  | 0  | 0  | 0  | 0  | 0  | 58 | 0  | NA |

Supplementary Table 28. Power of MDR to detect any model locus in the presence of genetic heterogeneity with 2000 cases and controls

| Proportion of data |       | <b>0.9</b> |     |     |     |     |    |    |     |     |     |
|--------------------|-------|------------|-----|-----|-----|-----|----|----|-----|-----|-----|
|                    | Model | 1          | 2   | 3   | 4   | 5   | 8  | 9  | 10  | 11  | 12  |
| <b>0.1</b>         | 1     | NA         | 2   | 100 | 99  | 99  | 5  | 13 | 98  | 100 | 97  |
|                    | 2     | 1          | NA  | 100 | 98  | 100 | 4  | 19 | 100 | 100 | 98  |
|                    | 3     | 2          | 6   | NA  | 98  | 99  | 5  | 17 | 99  | 100 | 100 |
|                    | 4     | 3          | 4   | 99  | NA  | 100 | 8  | 24 | 99  | 100 | 98  |
|                    | 5     | 2          | 4   | 99  | 100 | NA  | 3  | 26 | 99  | 100 | 95  |
|                    | 8     | 4          | 1   | 100 | 100 | 99  | NA | 17 | 98  | 100 | 99  |
|                    | 9     | 3          | 4   | 100 | 99  | 99  | 6  | NA | 100 | 98  | 98  |
|                    | 10    | 98         | 98  | 100 | 99  | 98  | 96 | 96 | NA  | 99  | 99  |
|                    | 11    | 99         | 100 | 100 | 99  | 100 | 99 | 98 | 100 | NA  | 100 |
|                    | 12    | 6          | 10  | 99  | 99  | 100 | 11 | 18 | 97  | 100 | NA  |

| Proportion of data |       | <b>0.75</b> |    |     |     |     |     |    |     |     |    |
|--------------------|-------|-------------|----|-----|-----|-----|-----|----|-----|-----|----|
|                    | Model | 1           | 2  | 3   | 4   | 5   | 8   | 9  | 10  | 11  | 12 |
| <b>0.25</b>        | 1     | NA          | 3  | 100 | 99  | 96  | 2   | 8  | 100 | 98  | 99 |
|                    | 2     | 0           | NA | 100 | 97  | 99  | 3   | 8  | 97  | 100 | 98 |
|                    | 3     | 28          | 24 | NA  | 98  | 99  | 33  | 26 | 95  | 100 | 99 |
|                    | 4     | 16          | 10 | 100 | NA  | 100 | 33  | 29 | 99  | 99  | 97 |
|                    | 5     | 33          | 39 | 100 | 98  | NA  | 67  | 59 | 98  | 98  | 99 |
|                    | 8     | 1           | 3  | 100 | 99  | 100 | NA  | 6  | 94  | 100 | 99 |
|                    | 9     | 3           | 5  | 100 | 100 | 97  | 8   | NA | 97  | 100 | 98 |
|                    | 10    | 93          | 95 | 100 | 99  | 100 | 91  | 97 | NA  | 99  | 98 |
|                    | 11    | 97          | 97 | 100 | 99  | 100 | 100 | 99 | 100 | NA  | 95 |
|                    | 12    | 57          | 71 | 98  | 99  | 99  | 64  | 70 | 96  | 100 | NA |

| Proportion of data |       | <b>0.5</b> |     |     |     |     |    |     |    |    |    |
|--------------------|-------|------------|-----|-----|-----|-----|----|-----|----|----|----|
|                    | Model | 1          | 2   | 3   | 4   | 5   | 8  | 9   | 10 | 11 | 12 |
| <b>0.5</b>         | 1     | NA         |     |     |     |     |    |     |    |    |    |
|                    | 2     | 1          | NA  |     |     |     |    |     |    |    |    |
|                    | 3     | 100        | 100 | NA  |     |     |    |     |    |    |    |
|                    | 4     | 99         | 98  | 95  | NA  |     |    |     |    |    |    |
|                    | 5     | 100        | 100 | 100 | 100 | NA  |    |     |    |    |    |
|                    | 8     | 1          | 5   | 100 | 99  | 99  | NA |     |    |    |    |
|                    | 9     | 3          | 2   | 100 | 100 | 98  | 4  | NA  |    |    |    |
|                    | 10    | 95         | 94  | 99  | 98  | 100 | 93 | 95  | NA |    |    |
|                    | 11    | 100        | 100 | 97  | 97  | 100 | 98 | 100 | 98 | NA |    |
|                    | 12    | 98         | 99  | 100 | 99  | 100 | 99 | 99  | 99 | 99 | NA |

Supplementary Table 29. Power of MDR to detect either model in the presence of genetic heterogeneity with 2000 cases and controls

| Proportion of data |       | <b>0.9</b> |    |     |     |     |    |    |     |     |     |
|--------------------|-------|------------|----|-----|-----|-----|----|----|-----|-----|-----|
|                    | Model | 1          | 2  | 3   | 4   | 5   | 8  | 9  | 10  | 11  | 12  |
| <b>0.1</b>         | 1     | NA         | 0  | 100 | 99  | 98  | 2  | 12 | 98  | 100 | 97  |
|                    | 2     | 0          | NA | 100 | 98  | 100 | 1  | 14 | 100 | 99  | 98  |
|                    | 3     | 0          | 2  | NA  | 98  | 99  | 1  | 17 | 99  | 98  | 100 |
|                    | 4     | 0          | 2  | 99  | NA  | 100 | 2  | 19 | 99  | 100 | 97  |
|                    | 5     | 0          | 1  | 99  | 100 | NA  | 0  | 24 | 99  | 99  | 94  |
|                    | 8     | 0          | 1  | 100 | 100 | 98  | NA | 16 | 97  | 98  | 98  |
|                    | 9     | 0          | 1  | 100 | 99  | 99  | 1  | NA | 100 | 97  | 98  |
|                    | 10    | 1          | 1  | 99  | 99  | 98  | 4  | 16 | NA  | 99  | 98  |
|                    | 11    | 4          | 5  | 100 | 99  | 100 | 3  | 9  | 100 | NA  | 100 |
|                    | 12    | 1          | 5  | 98  | 98  | 100 | 2  | 16 | 96  | 100 | NA  |

| Proportion of data |       | <b>0.75</b> |    |     |     |     |    |    |    |     |    |
|--------------------|-------|-------------|----|-----|-----|-----|----|----|----|-----|----|
|                    | Model | 1           | 2  | 3   | 4   | 5   | 8  | 9  | 10 | 11  | 12 |
| <b>0.25</b>        | 1     | NA          | 0  | 100 | 99  | 96  | 0  | 6  | 99 | 97  | 98 |
|                    | 2     | 0           | NA | 100 | 97  | 98  | 2  | 7  | 96 | 100 | 98 |
|                    | 3     | 24          | 22 | NA  | 98  | 99  | 30 | 23 | 95 | 100 | 99 |
|                    | 4     | 14          | 10 | 100 | NA  | 100 | 24 | 25 | 97 | 99  | 95 |
|                    | 5     | 33          | 36 | 100 | 98  | NA  | 62 | 51 | 98 | 98  | 99 |
|                    | 8     | 0           | 0  | 100 | 99  | 100 | NA | 5  | 94 | 100 | 97 |
|                    | 9     | 0           | 0  | 100 | 100 | 97  | 0  | NA | 97 | 99  | 97 |
|                    | 10    | 13          | 8  | 100 | 99  | 100 | 14 | 13 | NA | 99  | 98 |
|                    | 11    | 31          | 32 | 100 | 99  | 100 | 37 | 34 | 99 | NA  | 95 |
|                    | 12    | 53          | 68 | 98  | 99  | 98  | 59 | 65 | 94 | 100 | NA |

| Proportion of data |       | <b>0.5</b> |     |     |     |     |    |     |    |    |    |
|--------------------|-------|------------|-----|-----|-----|-----|----|-----|----|----|----|
|                    | Model | 1          | 2   | 3   | 4   | 5   | 8  | 9   | 10 | 11 | 12 |
| <b>0.5</b>         | 1     | NA         |     |     |     |     |    |     |    |    |    |
|                    | 2     | 0          | NA  |     |     |     |    |     |    |    |    |
|                    | 3     | 100        | 100 | NA  |     |     |    |     |    |    |    |
|                    | 4     | 99         | 97  | 95  | NA  |     |    |     |    |    |    |
|                    | 5     | 100        | 100 | 100 | 100 | NA  |    |     |    |    |    |
|                    | 8     | 0          | 0   | 100 | 98  | 99  | NA |     |    |    |    |
|                    | 9     | 0          | 0   | 100 | 100 | 98  | 0  | NA  |    |    |    |
|                    | 10    | 90         | 90  | 99  | 96  | 100 | 91 | 91  | NA |    |    |
|                    | 11    | 100        | 100 | 97  | 96  | 100 | 97 | 100 | 96 | NA |    |
|                    | 12    | 98         | 99  | 100 | 99  | 100 | 99 | 97  | 99 | 97 | NA |

Supplementary Table 30. Power of MDR to detect both models in the presence of locus heterogeneity with 2000 cases and controls

| Proportion of data |    | 0.9 |    |    |    |    |    |    |    |    |    |
|--------------------|----|-----|----|----|----|----|----|----|----|----|----|
| Model              | 1  | 2   | 3  | 4  | 5  | 8  | 9  | 10 | 11 | 12 |    |
| 0.1                | 1  | NA  | 0  | 0  | 0  | 0  | 0  | 0  | 0  | 0  | 0  |
|                    | 2  | 0   | NA | 0  | 0  | 1  | 0  | 0  | 0  | 0  | 0  |
|                    | 3  | 0   | 0  | NA | 0  | 0  | 0  | 0  | 0  | 0  | 0  |
|                    | 4  | 0   | 0  | 0  | NA | 0  | 0  | 0  | 0  | 0  | 0  |
|                    | 5  | 0   | 0  | 0  | 0  | NA | 0  | 0  | 0  | 0  | 0  |
|                    | 8  | 0   | 0  | 0  | 0  | 0  | NA | 0  | 0  | 0  | 0  |
|                    | 9  | 0   | 0  | 0  | 1  | 0  | 0  | NA | 0  | 0  | 0  |
|                    | 10 | 0   | 0  | 0  | 1  | 0  | 0  | 0  | NA | 0  | 0  |
|                    | 11 | 0   | 0  | 0  | 0  | 0  | 0  | 0  | 0  | NA | 0  |
|                    | 12 | 0   | 0  | 0  | 0  | 0  | 0  | 0  | 0  | 0  | NA |

| Proportion of data |    | 0.75 |    |    |    |    |    |    |    |    |    |
|--------------------|----|------|----|----|----|----|----|----|----|----|----|
| Model              | 1  | 2    | 3  | 4  | 5  | 8  | 9  | 10 | 11 | 12 |    |
| 0.25               | 1  | NA   | 0  | 0  | 0  | 0  | 0  | 0  | 0  | 0  | 0  |
|                    | 2  | 0    | NA | 0  | 0  | 0  | 0  | 0  | 0  | 0  | 0  |
|                    | 3  | 0    | 0  | NA | 8  | 2  | 0  | 0  | 5  | 0  | 5  |
|                    | 4  | 0    | 0  | 0  | NA | 6  | 0  | 0  | 2  | 2  | 1  |
|                    | 5  | 0    | 0  | 0  | 9  | NA | 0  | 0  | 6  | 3  | 6  |
|                    | 8  | 0    | 0  | 0  | 0  | 0  | NA | 0  | 0  | 0  | 0  |
|                    | 9  | 0    | 0  | 0  | 0  | 0  | 0  | NA | 0  | 0  | 0  |
|                    | 10 | 0    | 0  | 0  | 0  | 1  | 0  | 0  | NA | 0  | 2  |
|                    | 11 | 0    | 0  | 0  | 0  | 0  | 0  | 0  | 0  | NA | 0  |
|                    | 12 | 0    | 0  | 4  | 6  | 6  | 1  | 3  | 8  | 4  | NA |

| Proportion of data |    | 0.5 |    |    |    |    |    |    |    |    |    |
|--------------------|----|-----|----|----|----|----|----|----|----|----|----|
| Model              | 1  | 2   | 3  | 4  | 5  | 8  | 9  | 10 | 11 | 12 |    |
| 0.5                | 1  | NA  |    |    |    |    |    |    |    |    |    |
|                    | 2  | 0   | NA |    |    |    |    |    |    |    |    |
|                    | 3  | 0   | 0  | NA |    |    |    |    |    |    |    |
|                    | 4  | 0   | 0  | 43 | NA |    |    |    |    |    |    |
|                    | 5  | 0   | 0  | 94 | 71 | NA |    |    |    |    |    |
|                    | 8  | 0   | 0  | 0  | 0  | 0  | NA |    |    |    |    |
|                    | 9  | 0   | 0  | 0  | 0  | 1  | 0  | NA |    |    |    |
|                    | 10 | 0   | 0  | 52 | 56 | 71 | 0  | 0  | NA |    |    |
|                    | 11 | 0   | 0  | 55 | 82 | 87 | 0  | 0  | 17 | NA |    |
|                    | 12 | 0   | 0  | 99 | 85 | 98 | 0  | 0  | 44 | 77 | NA |

Supplementary Table 31. Power of MDR to detect any model locus in the presence of genetic heterogeneity with 2000 cases and 4000 controls

| Proportion of data |    | 0.9 |    |     |     |     |     |    |     |     |     |
|--------------------|----|-----|----|-----|-----|-----|-----|----|-----|-----|-----|
| Model              | 1  | 2   | 3  | 4   | 5   | 8   | 9   | 10 | 11  | 12  |     |
| 0.1                | 1  | NA  | 4  | 100 | 99  | 100 | 3   | 41 | 100 | 99  | 100 |
|                    | 2  | 3   | NA | 100 | 98  | 100 | 5   | 33 | 100 | 100 | 98  |
|                    | 3  | 2   | 5  | NA  | 100 | 100 | 6   | 41 | 100 | 100 | 99  |
|                    | 4  | 2   | 3  | 100 | NA  | 100 | 6   | 35 | 100 | 99  | 97  |
|                    | 5  | 1   | 8  | 100 | 99  | NA  | 7   | 27 | 100 | 99  | 99  |
|                    | 8  | 2   | 5  | 100 | 99  | 99  | NA  | 99 | 100 | 100 | 99  |
|                    | 9  | 6   | 99 | 100 | 96  | 100 | 100 | NA | 100 | 100 | 98  |
|                    | 10 | 96  | 97 | 100 | 98  | 100 | 100 | 98 | NA  | 100 | 0   |
|                    | 11 | 100 | 6  | 99  | 99  | 99  | 4   | 34 | 98  | NA  | 0   |
|                    | 12 | 0   | 0  | 0   | 0   | 0   | 0   | 0  | 0   | 0   | NA  |

| Proportion of data |    | 0.75 |    |     |     |     |     |    |     |     |    |
|--------------------|----|------|----|-----|-----|-----|-----|----|-----|-----|----|
| Model              | 1  | 2    | 3  | 4   | 5   | 8   | 9   | 10 | 11  | 12  |    |
| 0.25               | 1  | NA   | 6  | 100 | 98  | 100 | 2   | 17 | 100 | 100 | 96 |
|                    | 2  | 2    | NA | 100 | 98  | 100 | 57  | 47 | 95  | 98  | 97 |
|                    | 3  | 48   | 50 | NA  | 99  | 97  | 29  | 31 | 99  | 100 | 95 |
|                    | 4  | 19   | 17 | 100 | NA  | 100 | 74  | 61 | 100 | 99  | 98 |
|                    | 5  | 52   | 55 | 100 | 99  | NA  | 5   | 12 | 98  | 100 | 95 |
|                    | 8  | 7    | 1  | 100 | 98  | 100 | NA  | 96 | 99  | 99  | 97 |
|                    | 9  | 2    | 4  | 100 | 100 | 99  | 96  | NA | 100 | 100 | 98 |
|                    | 10 | 98   | 98 | 100 | 100 | 100 | 100 | 97 | NA  | 97  | 0  |
|                    | 11 | 97   | 96 | 98  | 100 | 99  | 58  | 65 | 95  | NA  | 0  |
|                    | 12 | 73   | 66 | 0   | 0   | 0   | 0   | 0  | 0   | 0   | NA |

| Proportion of data |    | 0.5 |     |     |     |     |    |    |    |    |    |
|--------------------|----|-----|-----|-----|-----|-----|----|----|----|----|----|
| Model              | 1  | 2   | 3   | 4   | 5   | 8   | 9  | 10 | 11 | 12 |    |
| 0.5                | 1  | NA  |     |     |     |     |    |    |    |    |    |
|                    | 2  | 6   | NA  |     |     |     |    |    |    |    |    |
|                    | 3  | 100 | 100 | NA  |     |     |    |    |    |    |    |
|                    | 4  | 99  | 100 | 99  | NA  |     |    |    |    |    |    |
|                    | 5  | 100 | 100 | 100 | 100 | NA  |    |    |    |    |    |
|                    | 8  | 7   | 4   | 100 | 99  | 99  | NA |    |    |    |    |
|                    | 9  | 1   | 3   | 100 | 100 | 100 | 3  | NA |    |    |    |
|                    | 10 | 95  | 98  | 100 | 99  | 99  | 98 | 95 | NA |    |    |
|                    | 11 | 99  | 99  | 99  | 100 | 99  | 98 | 99 | 99 | NA |    |
|                    | 12 | 99  | 98  | 100 | 100 | 100 | 98 | 98 | 99 | 99 | NA |

Supplementary Table 32. Power of MDR to detect either model in the presence of genetic heterogeneity with 2000 cases and 4000 controls

| Proportion of data |       | <b>0.9</b> |    |     |    |     |    |    |     |     |     |
|--------------------|-------|------------|----|-----|----|-----|----|----|-----|-----|-----|
|                    | Model | 1          | 2  | 3   | 4  | 5   | 8  | 9  | 10  | 11  | 12  |
| <b>0.1</b>         | 1     | NA         | 3  | 100 | 99 | 100 | 1  | 40 | 100 | 99  | 100 |
|                    | 2     | 0          | NA | 100 | 98 | 98  | 3  | 32 | 100 | 99  | 98  |
|                    | 3     | 0          | 3  | NA  | 99 | 98  | 2  | 36 | 100 | 100 | 99  |
|                    | 4     | 0          | 2  | 100 | NA | 100 | 1  | 34 | 100 | 99  | 97  |
|                    | 5     | 0          | 4  | 100 | 99 | NA  | 3  | 27 | 99  | 99  | 98  |
|                    | 8     | 0          | 0  | 100 | 98 | 99  | NA | 25 | 100 | 100 | 98  |
|                    | 9     | 0          | 7  | 100 | 96 | 99  | 6  | NA | 100 | 100 | 98  |
|                    | 10    | 3          | 4  | 100 | 98 | 99  | 3  | 26 | NA  | 100 | 0   |
|                    | 11    | 2          | 1  | 99  | 99 | 99  | 0  | 30 | 98  | NA  | 0   |
|                    | 12    | 0          | 0  | 0   | 0  | 0   | 0  | 0  | 0   | 0   | NA  |

| Proportion of data |       | <b>0.75</b> |    |     |     |     |    |    |     |     |    |
|--------------------|-------|-------------|----|-----|-----|-----|----|----|-----|-----|----|
|                    | Model | 1           | 2  | 3   | 4   | 5   | 8  | 9  | 10  | 11  | 12 |
| <b>0.25</b>        | 1     | NA          | 2  | 100 | 98  | 100 | 0  | 16 | 100 | 99  | 96 |
|                    | 2     | 0           | NA | 100 | 98  | 100 | 56 | 46 | 95  | 97  | 97 |
|                    | 3     | 46          | 46 | NA  | 99  | 96  | 26 | 30 | 98  | 99  | 95 |
|                    | 4     | 17          | 13 | 100 | NA  | 100 | 71 | 54 | 98  | 99  | 97 |
|                    | 5     | 50          | 51 | 100 | 98  | NA  | 1  | 8  | 97  | 100 | 95 |
|                    | 8     | 0           | 0  | 100 | 96  | 100 | NA | 16 | 98  | 99  | 97 |
|                    | 9     | 0           | 1  | 99  | 100 | 99  | 17 | NA | 100 | 99  | 98 |
|                    | 10    | 19          | 15 | 100 | 100 | 100 | 54 | 36 | NA  | 96  | 0  |
|                    | 11    | 50          | 46 | 96  | 100 | 99  | 52 | 61 | 93  | NA  | 0  |
|                    | 12    | 71          | 64 | 0   | 0   | 0   | 0  | 0  | 0   | 0   | NA |

| Proportion of data |       | <b>0.5</b> |     |     |     |     |    |    |    |    |    |
|--------------------|-------|------------|-----|-----|-----|-----|----|----|----|----|----|
|                    | Model | 1          | 2   | 3   | 4   | 5   | 8  | 9  | 10 | 11 | 12 |
| <b>0.5</b>         | 1     | NA         |     |     |     |     |    |    |    |    |    |
|                    | 2     | 1          | NA  |     |     |     |    |    |    |    |    |
|                    | 3     | 100        | 100 | NA  |     |     |    |    |    |    |    |
|                    | 4     | 99         | 100 | 99  | NA  |     |    |    |    |    |    |
|                    | 5     | 100        | 100 | 100 | 100 | NA  |    |    |    |    |    |
|                    | 8     | 1          | 0   | 100 | 99  | 99  | NA |    |    |    |    |
|                    | 9     | 1          | 1   | 100 | 99  | 100 | 1  | NA |    |    |    |
|                    | 10    | 92         | 96  | 100 | 98  | 98  | 98 | 90 | NA |    |    |
|                    | 11    | 98         | 99  | 98  | 100 | 99  | 98 | 99 | 99 | NA |    |
|                    | 12    | 99         | 98  | 100 | 100 | 100 | 98 | 98 | 98 | 98 | NA |



Supplementary Table 33. Power of MDR to detect both models in the presence of locus heterogeneity with 2000 cases and 4000 controls

| Proportion of data |       | 0.9 |    |    |    |    |    |    |    |    |    |
|--------------------|-------|-----|----|----|----|----|----|----|----|----|----|
|                    | Model | 1   | 2  | 3  | 4  | 5  | 8  | 9  | 10 | 11 | 12 |
| 0.1                | 1     | NA  | 0  | 0  | 0  | 0  | 0  | 0  | 0  | 0  | 0  |
|                    | 2     | 0   | NA | 0  | 2  | 0  | 0  | 0  | 0  | 0  | 0  |
|                    | 3     | 0   | 0  | NA | 0  | 0  | 0  | 0  | 0  | 0  | 0  |
|                    | 4     | 0   | 0  | 0  | NA | 0  | 0  | 0  | 0  | 0  | 0  |
|                    | 5     | 0   | 0  | 0  | 0  | NA | 0  | 0  | 0  | 0  | 0  |
|                    | 8     | 0   | 0  | 0  | 0  | 0  | NA | 0  | 0  | 0  | 0  |
|                    | 9     | 0   | 0  | 0  | 0  | 0  | 0  | NA | 0  | 0  | 0  |
|                    | 10    | 0   | 0  | 0  | 0  | 0  | 0  | 0  | NA | 0  | 0  |
|                    | 11    | 0   | 0  | 0  | 0  | 0  | 0  | 1  | 0  | NA | 0  |
|                    | 12    | 0   | 0  | 0  | 0  | 0  | 0  | 0  | 0  | 0  | NA |

| Proportion of data |       | 0.75 |    |    |    |    |    |    |    |    |    |
|--------------------|-------|------|----|----|----|----|----|----|----|----|----|
|                    | Model | 1    | 2  | 3  | 4  | 5  | 8  | 9  | 10 | 11 | 12 |
| 0.25               | 1     | NA   | 0  | 0  | 0  | 0  | 0  | 0  | 0  | 0  | 0  |
|                    | 2     | 0    | NA | 0  | 7  | 5  | 0  | 0  | 9  | 5  | 1  |
|                    | 3     | 0    | 0  | NA | 5  | 3  | 0  | 0  | 0  | 4  | 0  |
|                    | 4     | 0    | 0  | 0  | NA | 0  | 0  | 0  | 1  | 0  | 0  |
|                    | 5     | 0    | 0  | 0  | 0  | NA | 0  | 0  | 0  | 0  | 1  |
|                    | 8     | 0    | 0  | 0  | 0  | 0  | NA | 0  | 0  | 0  | 1  |
|                    | 9     | 0    | 0  | 0  | 4  | 3  | 0  | NA | 0  | 1  | 1  |
|                    | 10    | 0    | 0  | 0  | 2  | 2  | 0  | 0  | NA | 3  | 0  |
|                    | 11    | 0    | 0  | 8  | 3  | 9  | 0  | 8  | 2  | NA | 0  |
|                    | 12    | 0    | 0  | 0  | 0  | 0  | 0  | 0  | 0  | 0  | NA |

| Proportion of data |       | 0.5 |    |     |    |    |    |    |    |    |    |
|--------------------|-------|-----|----|-----|----|----|----|----|----|----|----|
|                    | Model | 1   | 2  | 3   | 4  | 5  | 8  | 9  | 10 | 11 | 12 |
| 0.5                | 1     | NA  |    |     |    |    |    |    |    |    |    |
|                    | 2     | 0   | NA |     |    |    |    |    |    |    |    |
|                    | 3     | 0   | 0  | NA  |    |    |    |    |    |    |    |
|                    | 4     | 0   | 1  | 71  | NA |    |    |    |    |    |    |
|                    | 5     | 0   | 0  | 97  | 88 | NA |    |    |    |    |    |
|                    | 8     | 0   | 0  | 0   | 0  | 0  | NA |    |    |    |    |
|                    | 9     | 0   | 0  | 0   | 1  | 1  | 0  | NA |    |    |    |
|                    | 10    | 0   | 0  | 67  | 80 | 84 | 0  | 0  | NA |    |    |
|                    | 11    | 0   | 0  | 71  | 97 | 95 | 0  | 0  | 21 | NA |    |
|                    | 12    | 0   | 0  | 100 | 97 | 99 | 0  | 1  | 58 | 88 | NA |

Supplementary Table 34. Power of MDR to detect any model locus in the presence of genetic heterogeneity with 2000 cases and 8000 controls

| Proportion of data |           | <b>0.9</b> |    |     |     |     |    |    |     |     |     |
|--------------------|-----------|------------|----|-----|-----|-----|----|----|-----|-----|-----|
| Model              | 1         | 2          | 3  | 4   | 5   | 8   | 9  | 10 | 11  | 12  |     |
| <b>0.1</b>         | <b>1</b>  | NA         | 6  | 100 | 99  | 100 | 1  | 51 | 100 | 99  | 99  |
|                    | <b>2</b>  | 4          | NA | 100 | 97  | 99  | 7  | 52 | 100 | 99  | 98  |
|                    | <b>3</b>  | 2          | 10 | NA  | 98  | 98  | 3  | 44 | 100 | 100 | 98  |
|                    | <b>4</b>  | 2          | 2  | 100 | NA  | 100 | 5  | 47 | 100 | 100 | 99  |
|                    | <b>5</b>  | 3          | 9  | 100 | 98  | NA  | 7  | 48 | 100 | 99  | 98  |
|                    | <b>8</b>  | 5          | 8  | 100 | 99  | 100 | NA | 37 | 100 | 99  | 99  |
|                    | <b>9</b>  | 3          | 6  | 100 | 96  | 99  | 4  | NA | 100 | 99  | 99  |
|                    | <b>10</b> | 97         | 98 | 100 | 99  | 100 | 99 | 99 | NA  | 100 | 96  |
|                    | <b>11</b> | 100        | 98 | 100 | 100 | 100 | 98 | 99 | 100 | NA  | 100 |
|                    | <b>12</b> | 1          | 14 | 100 | 99  | 99  | 8  | 60 | 97  | 100 | NA  |

| Proportion of data |           | <b>0.75</b> |     |     |     |     |    |    |     |     |     |
|--------------------|-----------|-------------|-----|-----|-----|-----|----|----|-----|-----|-----|
| Model              | 1         | 2           | 3   | 4   | 5   | 8   | 9  | 10 | 11  | 12  |     |
| <b>0.25</b>        | <b>1</b>  | NA          | 4   | 100 | 99  | 99  | 4  | 27 | 99  | 100 | 98  |
|                    | <b>2</b>  | 2           | NA  | 100 | 99  | 100 | 4  | 20 | 99  | 99  | 99  |
|                    | <b>3</b>  | 62          | 61  | NA  | 99  | 98  | 70 | 60 | 97  | 100 | 95  |
|                    | <b>4</b>  | 25          | 25  | 100 | NA  | 99  | 46 | 25 | 99  | 99  | 99  |
|                    | <b>5</b>  | 63          | 70  | 100 | 99  | NA  | 65 | 78 | 99  | 100 | 99  |
|                    | <b>8</b>  | 1           | 5   | 100 | 100 | 99  | NA | 15 | 99  | 100 | 100 |
|                    | <b>9</b>  | 1           | 3   | 100 | 99  | 100 | 4  | NA | 100 | 100 | 100 |
|                    | <b>10</b> | 97          | 98  | 100 | 95  | 99  | 98 | 98 | NA  | 100 | 100 |
|                    | <b>11</b> | 100         | 100 | 100 | 95  | 100 | 99 | 97 | 100 | NA  | 100 |
|                    | <b>12</b> | 78          | 76  | 100 | 97  | 98  | 66 | 77 | 95  | 99  | NA  |

| Proportion of data |           | <b>0.5</b> |     |     |     |     |     |     |     |     |    |
|--------------------|-----------|------------|-----|-----|-----|-----|-----|-----|-----|-----|----|
| Model              | 1         | 2          | 3   | 4   | 5   | 8   | 9   | 10  | 11  | 12  |    |
| <b>0.5</b>         | <b>1</b>  | NA         |     |     |     |     |     |     |     |     |    |
|                    | <b>2</b>  | 2          | NA  |     |     |     |     |     |     |     |    |
|                    | <b>3</b>  | 100        | 100 | NA  |     |     |     |     |     |     |    |
|                    | <b>4</b>  | 100        | 100 | 99  | NA  |     |     |     |     |     |    |
|                    | <b>5</b>  | 98         | 100 | 100 | 100 | NA  |     |     |     |     |    |
|                    | <b>8</b>  | 3          | 4   | 100 | 99  | 100 | NA  |     |     |     |    |
|                    | <b>9</b>  | 7          | 4   | 100 | 99  | 99  | 6   | NA  |     |     |    |
|                    | <b>10</b> | 96         | 97  | 98  | 100 | 100 | 97  | 100 | NA  |     |    |
|                    | <b>11</b> | 99         | 99  | 99  | 100 | 100 | 99  | 99  | 100 | NA  |    |
|                    | <b>12</b> | 99         | 100 | 100 | 100 | 100 | 100 | 99  | 100 | 100 | NA |

Supplementary Table 35. Power of MDR to detect either model in the presence of genetic heterogeneity with 2000 cases and 8000 controls

| Proportion of data |       | <b>0.9</b> |    |     |    |     |    |    |     |     |     |
|--------------------|-------|------------|----|-----|----|-----|----|----|-----|-----|-----|
|                    | Model | 1          | 2  | 3   | 4  | 5   | 8  | 9  | 10  | 11  | 12  |
| <b>0.1</b>         | 1     | NA         | 4  | 100 | 98 | 100 | 0  | 49 | 100 | 99  | 99  |
|                    | 2     | 0          | NA | 100 | 97 | 99  | 3  | 50 | 100 | 99  | 97  |
|                    | 3     | 0          | 7  | NA  | 98 | 98  | 0  | 43 | 100 | 100 | 98  |
|                    | 4     | 0          | 1  | 100 | NA | 100 | 1  | 45 | 100 | 100 | 99  |
|                    | 5     | 0          | 5  | 100 | 98 | NA  | 4  | 47 | 100 | 99  | 98  |
|                    | 8     | 0          | 5  | 100 | 98 | 100 | NA | 35 | 100 | 99  | 98  |
|                    | 9     | 0          | 3  | 100 | 96 | 98  | 1  | NA | 100 | 97  | 99  |
|                    | 10    | 2          | 5  | 100 | 99 | 99  | 8  | 40 | NA  | 100 | 95  |
|                    | 11    | 4          | 5  | 100 | 99 | 100 | 3  | 37 | 100 | NA  | 100 |
|                    | 12    | 1          | 11 | 100 | 99 | 99  | 3  | 58 | 94  | 100 | NA  |

| Proportion of data |       | <b>0.75</b> |    |     |     |     |    |    |     |     |     |
|--------------------|-------|-------------|----|-----|-----|-----|----|----|-----|-----|-----|
|                    | Model | 1           | 2  | 3   | 4   | 5   | 8  | 9  | 10  | 11  | 12  |
| <b>0.25</b>        | 1     | NA          | 2  | 100 | 99  | 99  | 1  | 25 | 99  | 100 | 98  |
|                    | 2     | 0           | NA | 100 | 99  | 100 | 0  | 20 | 99  | 99  | 99  |
|                    | 3     | 60          | 61 | NA  | 99  | 98  | 68 | 58 | 96  | 100 | 95  |
|                    | 4     | 23          | 23 | 100 | NA  | 99  | 38 | 23 | 99  | 99  | 98  |
|                    | 5     | 62          | 70 | 100 | 98  | NA  | 63 | 76 | 99  | 100 | 99  |
|                    | 8     | 0           | 1  | 100 | 100 | 99  | NA | 12 | 99  | 100 | 99  |
|                    | 9     | 0           | 1  | 100 | 99  | 100 | 1  | NA | 100 | 97  | 100 |
|                    | 10    | 11          | 9  | 100 | 94  | 99  | 15 | 32 | NA  | 100 | 100 |
|                    | 11    | 54          | 59 | 100 | 95  | 100 | 57 | 52 | 100 | NA  | 100 |
|                    | 12    | 76          | 74 | 99  | 97  | 98  | 58 | 73 | 94  | 99  | NA  |

| Proportion of data |       | <b>0.5</b> |     |     |     |     |     |    |     |    |    |
|--------------------|-------|------------|-----|-----|-----|-----|-----|----|-----|----|----|
|                    | Model | 1          | 2   | 3   | 4   | 5   | 8   | 9  | 10  | 11 | 12 |
| <b>0.5</b>         | 1     | NA         |     |     |     |     |     |    |     |    |    |
|                    | 2     | 0          | NA  |     |     |     |     |    |     |    |    |
|                    | 3     | 100        | 100 | NA  |     |     |     |    |     |    |    |
|                    | 4     | 100        | 100 | 98  | NA  |     |     |    |     |    |    |
|                    | 5     | 97         | 100 | 100 | 100 | NA  |     |    |     |    |    |
|                    | 8     | 0          | 0   | 100 | 99  | 100 | NA  |    |     |    |    |
|                    | 9     | 5          | 4   | 100 | 99  | 99  | 4   | NA |     |    |    |
|                    | 10    | 94         | 97  | 98  | 100 | 100 | 94  | 98 | NA  |    |    |
|                    | 11    | 99         | 98  | 99  | 100 | 100 | 99  | 99 | 100 | NA |    |
|                    | 12    | 99         | 99  | 100 | 100 | 100 | 100 | 99 | 100 | 99 | NA |

Supplementary Table 36. Power of MDR to detect both models in the presence of locus heterogeneity with 2000 cases and 8000 controls

| Proportion of data |    | 0.9 |    |    |    |    |    |    |    |    |    |
|--------------------|----|-----|----|----|----|----|----|----|----|----|----|
| Model              | 1  | 2   | 3  | 4  | 5  | 8  | 9  | 10 | 11 | 12 |    |
| 0.1                | 1  | NA  | 0  | 0  | 0  | 0  | 0  | 0  | 0  | 0  | 0  |
|                    | 2  | 0   | NA | 0  | 0  | 0  | 0  | 0  | 0  | 0  | 0  |
|                    | 3  | 0   | 0  | NA | 0  | 0  | 0  | 0  | 0  | 0  | 0  |
|                    | 4  | 0   | 0  | 0  | NA | 0  | 0  | 0  | 0  | 0  | 0  |
|                    | 5  | 0   | 0  | 0  | 0  | NA | 0  | 0  | 0  | 0  | 0  |
|                    | 8  | 0   | 0  | 0  | 0  | 0  | NA | 0  | 0  | 0  | 0  |
|                    | 9  | 0   | 0  | 0  | 0  | 0  | 0  | NA | 0  | 0  | 0  |
|                    | 10 | 0   | 0  | 0  | 0  | 0  | 0  | 0  | NA | 0  | 0  |
|                    | 11 | 0   | 0  | 0  | 0  | 0  | 0  | 0  | 0  | NA | 0  |
|                    | 12 | 0   | 0  | 0  | 0  | 0  | 0  | 0  | 0  | 0  | NA |

| Proportion of data |    | 0.75 |    |    |    |    |    |    |    |    |    |
|--------------------|----|------|----|----|----|----|----|----|----|----|----|
| Model              | 1  | 2    | 3  | 4  | 5  | 8  | 9  | 10 | 11 | 12 |    |
| 0.25               | 1  | NA   | 0  | 0  | 0  | 0  | 0  | 0  | 0  | 0  | 0  |
|                    | 2  | 0    | NA | 0  | 0  | 1  | 0  | 0  | 0  | 0  | 0  |
|                    | 3  | 0    | 0  | NA | 0  | 2  | 0  | 0  | 8  | 9  | 7  |
|                    | 4  | 0    | 0  | 0  | NA | 5  | 0  | 0  | 2  | 8  | 6  |
|                    | 5  | 0    | 0  | 0  | 5  | NA | 0  | 1  | 5  | 3  | 6  |
|                    | 8  | 0    | 0  | 0  | 0  | 0  | NA | 0  | 0  | 0  | 0  |
|                    | 9  | 0    | 0  | 0  | 0  | 0  | 0  | NA | 0  | 0  | 0  |
|                    | 10 | 0    | 0  | 0  | 6  | 1  | 0  | 0  | NA | 1  | 1  |
|                    | 11 | 0    | 0  | 0  | 3  | 2  | 0  | 0  | 0  | NA | 0  |
|                    | 12 | 0    | 0  | 7  | 2  | 4  | 0  | 8  | 1  | 3  | NA |

| Proportion of data |    | 0.5 |    |     |     |     |    |    |    |    |    |
|--------------------|----|-----|----|-----|-----|-----|----|----|----|----|----|
| Model              | 1  | 2   | 3  | 4   | 5   | 8   | 9  | 10 | 11 | 12 |    |
| 0.5                | 1  | NA  |    |     |     |     |    |    |    |    |    |
|                    | 2  | 0   | NA |     |     |     |    |    |    |    |    |
|                    | 3  | 0   | 0  | NA  |     |     |    |    |    |    |    |
|                    | 4  | 0   | 0  | 66  | NA  |     |    |    |    |    |    |
|                    | 5  | 0   | 0  | 100 | 95  | NA  |    |    |    |    |    |
|                    | 8  | 0   | 0  | 0   | 0   | 0   | NA |    |    |    |    |
|                    | 9  | 0   | 0  | 0   | 0   | 1   | 0  | NA |    |    |    |
|                    | 10 | 0   | 0  | 71  | 85  | 88  | 0  | 0  | NA |    |    |
|                    | 11 | 0   | 0  | 75  | 99  | 97  | 0  | 0  | 22 | NA |    |
|                    | 12 | 0   | 0  | 100 | 100 | 100 | 0  | 1  | 86 | 77 | NA |
